# Supplementary material
Source: HighWire-hosted journal article supplement (doi:10.1101/rna.042218.113)
Supplement: Mod-SEq_TableS2-REPLACEMENT.pdf [file Mod-SEq_TableS2-REPLACEMENT.pdf]

Table S2. Mod-seq identified sites of DMS-dependent modification in yeast total RNA. The number of sequence reads indicating modification at each site are shown (RT stops), as are the total number for the gene (Total RT stops). The enrichment ratio is the relative enrichment of RT stops at each position in RNA from DMS treated culture as compared to untreated culture. The results of statistical analysis are given, including both raw (CMH) and Benjamini-Hochberg corrected (B-H) p-values.

| Gene  | Position | Nucleotide | 100 mM DMS Replicate 1 |                | No DMS Replicate 1 |                | 100 mM DMS Replicate 2 |                | No DMS Replicate 2 |                | Enrichment Ratio (DMS / No DMS) | CMH P-values | B-H adjusted P-values |
|-------|----------|------------|------------------------|----------------|--------------------|----------------|------------------------|----------------|--------------------|----------------|---------------------------------|--------------|-----------------------|
|       |          |            | RT stops               | Total RT stops | RT stops           | Total RT stops | RT stops               | Total RT stops | RT stops           | Total RT stops |                                 |              |                       |
| ETS1  | 303      | A          | 9                      | 1,456          | 0                  | 1,180          | 18                     | 979            | 2                  | 697            | 6.69                            | 0.0006305    | 0.04413               |
| ETS1  | 328      | A          | 15                     | 1,456          | 0                  | 1,180          | 9                      | 979            | 0                  | 697            | 9.20                            | 0.0005009    | 0.03896               |
| ETS1  | 405      | A          | 16                     | 1,456          | 1                  | 1,180          | 9                      | 979            | 1                  | 697            | 9.60                            | 0.0003336    | 0.02919               |
| ETS1  | 428      | A          | 26                     | 1,456          | 5                  | 1,180          | 12                     | 979            | 1                  | 697            | 4.97                            | 0.0001104    | 0.01546               |
| ETS1  | 452      | A          | 47                     | 1,456          | 5                  | 1,180          | 18                     | 979            | 0                  | 697            | 8.53                            | 4.66E-09     | 3.26E-06              |
| ETS1  | 469      | C          | 43                     | 1,456          | 5                  | 1,180          | 13                     | 979            | 1                  | 697            | 7.37                            | 1.24E-07     | 4.35E-05              |
| ETS1  | 581      | A          | 25                     | 1,456          | 0                  | 1,180          | 7                      | 979            | 2                  | 697            | 8.18                            | 5.60E-05     | 0.01306               |
| ITS1  | 5        | A          | 35                     | 1,236          | 15                 | 1,296          | 16                     | 1,063          | 4                  | 1,027          | 2.76                            | 0.0001603    | 0.006429              |
| ITS1  | 10       | A          | 59                     | 1,236          | 18                 | 1,296          | 13                     | 1,063          | 1                  | 1,027          | 3.95                            | 2.89E-08     | 2.60E-06              |
| ITS1  | 11       | A          | 28                     | 1,236          | 10                 | 1,296          | 12                     | 1,063          | 3                  | 1,027          | 3.16                            | 0.0002775    | 0.009106              |
| ITS1  | 13       | A          | 54                     | 1,236          | 19                 | 1,296          | 15                     | 1,063          | 3                  | 1,027          | 3.25                            | 9.03E-07     | 6.52E-05              |
| ITS1  | 14       | A          | 28                     | 1,236          | 5                  | 1,296          | 3                      | 1,063          | 4                  | 1,027          | 3.52                            | 0.0006839    | 0.02057               |
| ITS1  | 23       | A          | 15                     | 1,236          | 2                  | 1,296          | 5                      | 1,063          | 0                  | 1,027          | 6.82                            | 0.000706     | 0.01961               |
| ITS1  | 74       | A          | 30                     | 1,236          | 0                  | 1,296          | 17                     | 1,063          | 4                  | 1,027          | 9.39                            | 1.19E-08     | 1.43E-06              |
| ITS1  | 133      | A          | 21                     | 1,236          | 1                  | 1,296          | 27                     | 1,063          | 4                  | 1,027          | 9.54                            | 9.86E-09     | 1.78E-06              |
| ITS1  | 154      | A          | 21                     | 1,236          | 0                  | 1,296          | 18                     | 1,063          | 10                 | 1,027          | 3.52                            | 0.0001412    | 0.007282              |
| ITS1  | 155      | A          | 60                     | 1,236          | 40                 | 1,296          | 9                      | 1,063          | 34                 | 1,027          | 1.77                            | 0.0001442    | 0.006506              |
| ITS1  | 293      | A          | 13                     | 1,236          | 0                  | 1,296          | 9                      | 1,063          | 0                  | 1,027          | 11.11                           | 9.64E-05     | 0.005799              |
| ITS2  | 2        | C          | 42                     | 1,607          | 10                 | 1,319          | 15                     | 1,285          | 7                  | 990            | 2.69                            | 0.0003216    | 0.01066               |
| ITS2  | 5        | C          | 111                    | 1,607          | 30                 | 1,319          | 74                     | 1,285          | 17                 | 990            | 3.15                            | 5.62E-13     | 1.30E-10              |
| ITS2  | 47       | A          | 66                     | 1,607          | 27                 | 1,319          | 31                     | 1,285          | 13                 | 990            | 1.95                            | 0.0004884    | 0.01416               |
| ITS2  | 52       | G          | 31                     | 1,607          | 15                 | 1,319          | 35                     | 1,285          | 9                  | 990            | 2.19                            | 0.001217     | 0.02824               |
| ITS2  | 70       | A          | 71                     | 1,607          | 20                 | 1,319          | 30                     | 1,285          | 17                 | 990            | 2.19                            | 5.25E-05     | 0.002029              |
| ITS2  | 149      | A          | 50                     | 1,607          | 8                  | 1,319          | 30                     | 1,285          | 8                  | 990            | 3.99                            | 9.77E-08     | 7.56E-06              |
| ITS2  | 159      | A          | 33                     | 1,607          | 5                  | 1,319          | 20                     | 1,285          | 4                  | 990            | 4.71                            | 4.37E-06     | 0.0002028             |
| ITS2  | 160      | A          | 63                     | 1,607          | 10                 | 1,319          | 40                     | 1,285          | 8                  | 990            | 4.57                            | 1.66E-10     | 1.93E-08              |
| NME1  | 97       | A          | 56                     | 453            | 0                  | 301            | 37                     | 454            | 2                  | 350            | 22.10                           | 2.10E-13     | 7.15E-11              |
| RDN18 | 2        | A          | 2,201                  | 769,580        | 1,220              | 868,296        | 2,711                  | 672,446        | 1,152              | 699,560        | 2.24                            | 0            | 0                     |
| RDN18 | 25       | C          | 4,021                  | 769,580        | 1,807              | 868,296        | 2,921                  | 672,446        | 1,677              | 699,560        | 2.17                            | 0            | 0                     |
| RDN18 | 40       | A          | 430                    | 769,580        | 236                | 868,296        | 360                    | 672,446        | 184                | 699,560        | 2.05                            | 0            | 0                     |
| RDN18 | 43       | A          | 1,780                  | 769,580        | 790                | 868,296        | 1,171                  | 672,446        | 585                | 699,560        | 2.34                            | 0            | 0                     |
| RDN18 | 65       | A          | 5,511                  | 769,580        | 1,196              | 868,296        | 3,176                  | 672,446        | 630                | 699,560        | 5.22                            | 0            | 0                     |
| RDN18 | 67       | A          | 1,473                  | 769,580        | 317                | 868,296        | 1,113                  | 672,446        | 194                | 699,560        | 5.53                            | 0            | 0                     |
| RDN18 | 71       | A          | 4,263                  | 769,580        | 1,693              | 868,296        | 2,713                  | 672,446        | 852                | 699,560        | 3.00                            | 0            | 0                     |
| RDN18 | 72       | A          | 2,740                  | 769,580        | 1,909              | 868,296        | 1,906                  | 672,446        | 1,071              | 699,560        | 1.71                            | 0            | 0                     |
| RDN18 | 76       | A          | 1,488                  | 769,580        | 487                | 868,296        | 885                    | 672,446        | 499                | 699,560        | 2.62                            | 0            | 0                     |
| RDN18 | 80       | A          | 1,496                  | 769,580        | 510                | 868,296        | 1,355                  | 672,446        | 332                | 699,560        | 3.69                            | 0            | 0                     |
| RDN18 | 84       | A          | 907                    | 769,580        | 640                | 868,296        | 879                    | 672,446        | 546                | 699,560        | 1.64                            | 0            | 0                     |
| RDN18 | 103      | A          | 665                    | 769,580        | 364                | 868,296        | 414                    | 672,446        | 227                | 699,560        | 2.00                            | 0            | 0                     |
| RDN18 | 104      | A          | 1,881                  | 769,580        | 843                | 868,296        | 1,295                  | 672,446        | 582                | 699,560        | 2.43                            | 0            | 0                     |
| RDN18 | 130      | C          | 352                    | 769,580        | 144                | 868,296        | 174                    | 672,446        | 151                | 699,560        | 1.94                            | 0            | 0                     |
| RDN18 | 135      | A          | 778                    | 769,580        | 335                | 868,296        | 754                    | 672,446        | 230                | 699,560        | 2.95                            | 0            | 0                     |
| RDN18 | 136      | C          | 1,449                  | 769,580        | 851                | 868,296        | 1,027                  | 672,446        | 707                | 699,560        | 1.73                            | 0            | 0                     |
| RDN18 | 154      | G          | 1,197                  | 769,580        | 580                | 868,296        | 1,040                  | 672,446        | 380                | 699,560        | 2.54                            | 0            | 0                     |
| RDN18 | 176      | C          | 3,058                  | 769,580        | 1,175              | 868,296        | 1,413                  | 672,446        | 544                | 699,560        | 2.86                            | 0            | 0                     |
| RDN18 | 180      | A          | 1,241                  | 769,580        | 784                | 868,296        | 838                    | 672,446        | 465                | 699,560        | 1.82                            | 0            | 0                     |
| RDN18 | 181      | A          | 6,532                  | 769,580        | 2,759              | 868,296        | 5,403                  | 672,446        | 1,164              | 699,560        | 3.90                            | 0            | 0                     |
| RDN18 | 188      | A          | 968                    | 769,580        | 256                | 868,296        | 619                    | 672,446        | 199                | 699,560        | 3.85                            | 0            | 0                     |
| RDN18 | 196      | G          | 1,150                  | 769,580        | 695                | 868,296        | 692                    | 672,446        | 371                | 699,560        | 1.89                            | 0            | 0                     |
| RDN18 | 198      | A          | 1,172                  | 769,580        | 187                | 868,296        | 496                    | 672,446        | 87                 | 699,560        | 6.70                            | 0            | 0                     |
| RDN18 | 215      | A          | 4,615                  | 769,580        | 705                | 868,296        | 1,988                  | 672,446        | 296                | 699,560        | 7.26                            | 0            | 0                     |
| RDN18 | 228      | G          | 1,173                  | 769,580        | 896                | 868,296        | 1,109                  | 672,446        | 623                | 699,560        | 1.64                            | 0            | 0                     |
| RDN18 | 237      | C          | 2,782                  | 769,580        | 2,008              | 868,296        | 1,486                  | 672,446        | 948                | 699,560        | 1.59                            | 0            | 0                     |
| RDN18 | 251      | A          | 3,263                  | 769,580        | 779                | 868,296        | 2,114                  | 672,446        | 733                | 699,560        | 3.87                            | 0            | 0                     |
| RDN18 | 266      | A          | 4,191                  | 769,580        | 1,609              | 868,296        | 2,804                  | 672,446        | 1,084              | 699,560        | 2.84                            | 0            | 0                     |
| RDN18 | 271      | A          | 541                    | 769,580        | 320                | 868,296        | 586                    | 672,446        | 297                | 699,560        | 1.98                            | 0            | 0                     |
| RDN18 | 273      | G          | 105                    | 769,580        | 43                 | 868,296        | 138                    | 672,446        | 74                 | 699,560        | 2.23                            | 3.22E-13     | 9.86E-13              |
| RDN18 | 274      | G          | 149                    | 769,580        | 78                 | 868,296        | 255                    | 672,446        | 123                | 699,560        | 2.16                            | 0            | 0                     |
| RDN18 | 279      | G          | 458                    | 769,580        | 270                | 868,296        | 653                    | 672,446        | 420                | 699,560        | 1.73                            | 0            | 0                     |
| RDN18 | 281      | G          | 455                    | 769,580        | 172                | 868,296        | 660                    | 672,446        | 254                | 699,560        | 2.81                            | 0            | 0                     |
| RDN18 | 287      | G          | 1,506                  | 769,580        | 542                | 868,296        | 1,610                  | 672,446        | 600                | 699,560        | 2.95                            | 0            | 0                     |
| RDN18 | 288      | A          | 359                    | 769,580        | 171                | 868,296        | 535                    | 672,446        | 313                | 699,560        | 1.98                            | 0            | 0                     |
| RDN18 | 307      | G          | 143                    | 769,580        | 77                 | 868,296        | 225                    | 672,446        | 165                | 699,560        | 1.63                            | 3.34E-09     | 8.01E-09              |
| RDN18 | 312      | A          | 3,526                  | 769,580        | 867                | 868,296        | 2,737                  | 672,446        | 864                | 699,560        | 3.93                            | 0            | 0                     |
| RDN18 | 352      | A          | 13,839                 | 769,580        | 1,179              | 868,296        | 6,555                  | 672,446        | 769                | 699,560        | 11.47                           | 0            | 0                     |
| RDN18 | 359      | A          | 2,842                  | 769,580        | 961                | 868,296        | 1,623                  | 672,446        | 727                | 699,560        | 2.89                            | 0            | 0                     |
| RDN18 | 369      | A          | 384                    | 769,580        | 114                | 868,296        | 375                    | 672,446        | 211                | 699,560        | 2.52                            | 0            | 0                     |
| RDN18 | 412      | A          | 4,069                  | 769,580        | 826                | 868,296        | 2,732                  | 672,446        | 585                | 699,560        | 5.26                            | 0            | 0                     |
| RDN18 | 414      | C          | 91                     | 769,580        | 46                 | 868,296        | 92                     | 672,446        | 63                 | 699,560        | 1.81                            | 7.85E-07     | 1.54E-06              |
| RDN18 | 416      | A          | 577                    | 769,580        | 232                | 868,296        | 475                    | 672,446        | 223                | 699,560        | 2.51                            | 0            | 0                     |
| RDN18 | 417      | A          | 139                    | 769,580        | 69                 | 868,296        | 147                    | 672,446        | 89                 | 699,560        | 1.96                            | 7.41E-12     | 2.11E-11              |
| RDN18 | 420      | A          | 223                    | 769,580        | 125                | 868,296        | 148                    | 672,446        | 69                 | 699,560        | 2.09                            | 0            | 0                     |
| RDN18 | 421      | A          | 73                     | 769,580        | 41                 | 868,296        | 80                     | 672,446        | 63                 | 699,560        | 1.59                            | 0.0003156    | 0.0004956             |
| RDN18 | 436      | A          | 1,223                  | 769,580        | 962                | 868,296        | 907                    | 672,446        | 430                | 699,560        | 1.68                            | 0            | 0                     |
| RDN18 | 452      | A          | 2,547                  | 769,580        | 850                | 868,296        | 1,682                  | 672,446        | 523                | 699,560        | 3.37                            | 0            | 0                     |
| RDN18 | 455      | C          | 803                    | 769,580        | 442                | 868,296        | 576                    | 672,446        | 333                | 699,560        | 1.94                            | 0            | 0                     |
| RDN18 | 487      | G          | 37                     | 769,580        | 26                 | 868,296        | 21                     | 672,446        | 11                 | 699,560        | 1.72                            | 0.01209      | 0.0162                |
| RDN18 | 492      | A          | 1,577                  | 769,580        | 674                | 868,296        | 589                    | 672,446        | 320                | 699,560        | 2.40                            | 0            | 0                     |
| RDN18 | 497      | G          | 95                     | 769,580        | 62                 | 868,296        | 72                     | 672,446        | 33                 | 699,560        | 1.92                            | 3.31E-07     | 6.61E-07              |
| RDN18 | 498      | G          | 752                    | 769,580        | 479                | 868,296        | 446                    | 672,446        | 184                | 699,560        | 1.99                            | 0            | 0                     |
| RDN18 | 511      | A          | 1,226                  | 769,580        | 860                | 868,296        | 841                    | 672,446        | 512                | 699,560        | 1.65                            | 0            | 0                     |
| RDN18 | 515      | A          | 2,145                  | 769,580        | 151                | 868,296        | 1,572                  | 672,446        | 182                | 699,560        | 12.11                           | 0            | 0                     |
| RDN18 | 529      | A          | 1,696                  | 769,580        | 174                | 868,296        | 1,870                  | 672,446        | 337                | 699,560        | 7.50                            | 0            | 0                     |
| RDN18 | 530      | C          | 280                    | 769,580        | 110                | 868,296        | 274                    | 672,446        | 280                | 699,560        | 1.53                            | 1.26E-10     | 3.31E-10              |
| RDN18 | 534      | A          | 34,286                 | 769,580        | 2,255              | 868,296        | 17,720                 | 672,446        | 1,599              | 699,560        | 14.75                           | 0            | 0                     |
| RDN18 | 540      | G          | 793                    | 769,580        | 387                | 868,296        | 939                    | 672,446        | 509                | 699,560        | 2.09                            | 0            | 0                     |
| RDN18 | 541      | A          | 3,005                  | 769,580        | 1,239              | 868,296        | 1,519                  | 672,446        | 715                | 699,560        | 2.54                            | 0            | 0                     |
| RDN18 | 542      | A          | 2,239                  | 769,580        | 372                | 868,296        | 2,079                  | 672,446        | 450                | 699,560        | 5.68                            | 0            | 0                     |
| RDN18 | 544      | A          | 4,257                  | 769,580        | 745                | 868,296        | 2,964                  | 672,446        | 952                | 699,560        | 4.61                            | 0            | 0                     |
| RDN18 | 554      | C          | 1,381                  | 769,580        | 443                | 868,296        | 1,220                  | 672,446        | 566                | 699,560        | 2.79                            | 0            | 0                     |
| RDN18 | 579      | A          | 1,889                  | 769,580        | 867                | 868,296        | 1,550                  | 672,446        | 642                | 699,560        | 2.48                            | 0            | 0                     |
| RDN18 | 605      | A          | 227                    | 769,580        | 177                | 868,296        | 323                    | 672,446        | 171                | 699,560        | 1.71                            | 4.11E-15     | 1.36E-14              |
| RDN18 | 643      | G          | 80                     | 769,580        | 12                 | 868,296        | 205                    | 672,446        | 134                | 699,560        |                                 |              |                       |

|       |      |   |        |           |       |           |        |           |       |           |       |           |           |
|-------|------|---|--------|-----------|-------|-----------|--------|-----------|-------|-----------|-------|-----------|-----------|
| RDN18 | 707  | A | 360    | 769,580   | 227   | 868,296   | 459    | 672,446   | 191   | 699,560   | 2.12  | 0         | 0         |
| RDN18 | 714  | G | 1,405  | 769,580   | 841   | 868,296   | 1,934  | 672,446   | 607   | 699,560   | 2.50  | 0         | 0         |
| RDN18 | 722  | G | 121    | 769,580   | 93    | 868,296   | 136    | 672,446   | 76    | 699,560   | 1.65  | 4.47E-07  | 8.84E-07  |
| RDN18 | 730  | G | 179    | 769,580   | 127   | 868,296   | 261    | 672,446   | 137   | 699,560   | 1.80  | 3.13E-14  | 1.01E-13  |
| RDN18 | 733  | A | 1,631  | 769,580   | 750   | 868,296   | 1,208  | 672,446   | 439   | 699,560   | 2.61  | 0         | 0         |
| RDN18 | 734  | A | 1,558  | 769,580   | 367   | 868,296   | 1,631  | 672,446   | 242   | 699,560   | 5.70  | 0         | 0         |
| RDN18 | 739  | G | 686    | 769,580   | 589   | 868,296   | 558    | 672,446   | 308   | 699,560   | 1.52  | 0         | 0         |
| RDN18 | 741  | C | 3,581  | 769,580   | 1,082 | 868,296   | 2,359  | 672,446   | 649   | 699,560   | 3.75  | 0         | 0         |
| RDN18 | 756  | A | 3,296  | 769,580   | 1,338 | 868,296   | 3,148  | 672,446   | 829   | 699,560   | 3.24  | 0         | 0         |
| RDN18 | 771  | A | 940    | 769,580   | 280   | 868,296   | 673    | 672,446   | 190   | 699,560   | 3.75  | 0         | 0         |
| RDN18 | 780  | A | 2,193  | 769,580   | 1,192 | 868,296   | 1,277  | 672,446   | 504   | 699,560   | 2.25  | 0         | 0         |
| RDN18 | 787  | G | 832    | 769,580   | 495   | 868,296   | 552    | 672,446   | 146   | 699,560   | 2.38  | 0         | 0         |
| RDN18 | 789  | A | 1,872  | 769,580   | 656   | 868,296   | 813    | 672,446   | 331   | 699,560   | 2.99  | 0         | 0         |
| RDN18 | 803  | A | 3,185  | 769,580   | 1,456 | 868,296   | 1,653  | 672,446   | 509   | 699,560   | 2.71  | 0         | 0         |
| RDN18 | 809  | A | 528    | 769,580   | 218   | 868,296   | 289    | 672,446   | 125   | 699,560   | 2.61  | 0         | 0         |
| RDN18 | 811  | A | 2,506  | 769,580   | 1,601 | 868,296   | 958    | 672,446   | 682   | 699,560   | 1.67  | 0         | 0         |
| RDN18 | 812  | A | 7,949  | 769,580   | 1,138 | 868,296   | 2,641  | 672,446   | 640   | 699,560   | 6.55  | 0         | 0         |
| RDN18 | 816  | G | 3,438  | 769,580   | 1,976 | 868,296   | 2,479  | 672,446   | 1,826 | 699,560   | 1.69  | 0         | 0         |
| RDN18 | 853  | G | 2,795  | 769,580   | 1,460 | 868,296   | 2,354  | 672,446   | 747   | 699,560   | 2.55  | 0         | 0         |
| RDN18 | 859  | A | 4,474  | 769,580   | 2,046 | 868,296   | 2,673  | 672,446   | 923   | 699,560   | 2.64  | 0         | 0         |
| RDN18 | 875  | G | 51     | 769,580   | 21    | 868,296   | 40     | 672,446   | 38    | 699,560   | 1.67  | 0.002577  | 0.003705  |
| RDN18 | 885  | G | 518    | 769,580   | 342   | 868,296   | 274    | 672,446   | 221   | 699,560   | 1.54  | 3.44E-15  | 1.15E-14  |
| RDN18 | 904  | G | 666    | 769,580   | 386   | 868,296   | 456    | 672,446   | 275   | 699,560   | 1.85  | 0         | 0         |
| RDN18 | 929  | A | 2,802  | 769,580   | 714   | 868,296   | 1,320  | 672,446   | 389   | 699,560   | 4.10  | 0         | 0         |
| RDN18 | 934  | C | 541    | 769,580   | 228   | 868,296   | 263    | 672,446   | 204   | 699,560   | 2.03  | 0         | 0         |
| RDN18 | 970  | A | 857    | 769,580   | 183   | 868,296   | 536    | 672,446   | 152   | 699,560   | 4.53  | 0         | 0         |
| RDN18 | 971  | A | 149    | 769,580   | 86    | 868,296   | 122    | 672,446   | 86    | 699,560   | 1.71  | 3.21E-08  | 7.01E-08  |
| RDN18 | 993  | A | 1,038  | 769,580   | 122   | 868,296   | 649    | 672,446   | 136   | 699,560   | 7.11  | 0         | 0         |
| RDN18 | 1005 | A | 498    | 769,580   | 218   | 868,296   | 460    | 672,446   | 302   | 699,560   | 1.99  | 0         | 0         |
| RDN18 | 1020 | A | 384    | 769,580   | 241   | 868,296   | 359    | 672,446   | 191   | 699,560   | 1.87  | 0         | 0         |
| RDN18 | 1030 | A | 282    | 769,580   | 139   | 868,296   | 396    | 672,446   | 134   | 699,560   | 2.68  | 0         | 0         |
| RDN18 | 1061 | A | 2,498  | 769,580   | 779   | 868,296   | 1,984  | 672,446   | 499   | 699,560   | 3.83  | 0         | 0         |
| RDN18 | 1062 | A | 616    | 769,580   | 209   | 868,296   | 590    | 672,446   | 205   | 699,560   | 3.16  | 0         | 0         |
| RDN18 | 1091 | A | 717    | 769,580   | 311   | 868,296   | 284    | 672,446   | 145   | 699,560   | 2.42  | 0         | 0         |
| RDN18 | 1116 | A | 1,034  | 769,580   | 241   | 868,296   | 623    | 672,446   | 305   | 699,560   | 3.30  | 0         | 0         |
| RDN18 | 1126 | G | 78     | 769,580   | 62    | 868,296   | 88     | 672,446   | 29    | 699,560   | 1.99  | 1.21E-07  | 2.50E-07  |
| RDN18 | 1139 | A | 1,213  | 769,580   | 28    | 868,296   | 487    | 672,446   | 26    | 699,560   | 34.41 | 0         | 0         |
| RDN18 | 1140 | G | 52     | 769,580   | 9     | 868,296   | 26     | 672,446   | 10    | 699,560   | 4.47  | 2.27E-10  | 5.84E-10  |
| RDN18 | 1165 | G | 13     | 769,580   | 3     | 868,296   | 14     | 672,446   | 8     | 699,560   | 2.63  | 0.007754  | 0.01062   |
| RDN18 | 1193 | A | 6,772  | 769,580   | 2,289 | 868,296   | 2,868  | 672,446   | 1,024 | 699,560   | 3.20  | 0         | 0         |
| RDN18 | 1217 | A | 251    | 769,580   | 82    | 868,296   | 63     | 672,446   | 27    | 699,560   | 3.19  | 0         | 0         |
| RDN18 | 1219 | A | 1,202  | 769,580   | 187   | 868,296   | 390    | 672,446   | 110   | 699,560   | 5.90  | 0         | 0         |
| RDN18 | 1226 | A | 1,322  | 769,580   | 226   | 868,296   | 533    | 672,446   | 96    | 699,560   | 6.35  | 0         | 0         |
| RDN18 | 1227 | A | 407    | 769,580   | 76    | 868,296   | 152    | 672,446   | 22    | 699,560   | 6.31  | 0         | 0         |
| RDN18 | 1246 | C | 29,332 | 769,580   | 692   | 868,296   | 13,090 | 672,446   | 535   | 699,560   | 37.79 | 0         | 0         |
| RDN18 | 1247 | T | 265    | 769,580   | 97    | 868,296   | 178    | 672,446   | 79    | 699,560   | 2.74  | 0         | 0         |
| RDN18 | 1263 | G | 83     | 769,580   | 48    | 868,296   | 66     | 672,446   | 32    | 699,560   | 2.03  | 2.62E-07  | 5.27E-07  |
| RDN18 | 1265 | G | 1,150  | 769,580   | 201   | 868,296   | 1,037  | 672,446   | 104   | 699,560   | 7.83  | 0         | 0         |
| RDN18 | 1319 | A | 2,900  | 769,580   | 628   | 868,296   | 2,088  | 672,446   | 598   | 699,560   | 4.42  | 0         | 0         |
| RDN18 | 1325 | A | 4,364  | 769,580   | 1,615 | 868,296   | 2,393  | 672,446   | 927   | 699,560   | 2.91  | 0         | 0         |
| RDN18 | 1346 | A | 2,033  | 769,580   | 802   | 868,296   | 1,160  | 672,446   | 458   | 699,560   | 2.78  | 0         | 0         |
| RDN18 | 1360 | A | 1,530  | 769,580   | 889   | 868,296   | 888    | 672,446   | 576   | 699,560   | 1.81  | 0         | 0         |
| RDN18 | 1368 | G | 531    | 769,580   | 365   | 868,296   | 498    | 672,446   | 349   | 699,560   | 1.56  | 0         | 0         |
| RDN18 | 1371 | A | 1,351  | 769,580   | 490   | 868,296   | 1,103  | 672,446   | 519   | 699,560   | 2.64  | 0         | 0         |
| RDN18 | 1383 | G | 514    | 769,580   | 225   | 868,296   | 452    | 672,446   | 209   | 699,560   | 2.42  | 0         | 0         |
| RDN18 | 1402 | G | 326    | 769,580   | 206   | 868,296   | 318    | 672,446   | 187   | 699,560   | 1.78  | 0         | 0         |
| RDN18 | 1419 | G | 297    | 769,580   | 156   | 868,296   | 339    | 672,446   | 217   | 699,560   | 1.84  | 0         | 0         |
| RDN18 | 1421 | A | 2,385  | 769,580   | 784   | 868,296   | 1,776  | 672,446   | 811   | 699,560   | 2.83  | 0         | 0         |
| RDN18 | 1427 | A | 93     | 769,580   | 52    | 868,296   | 194    | 672,446   | 98    | 699,560   | 2.05  | 5.83E-13  | 1.76E-12  |
| RDN18 | 1428 | G | 208    | 769,580   | 101   | 868,296   | 316    | 672,446   | 119   | 699,560   | 2.57  | 0         | 0         |
| RDN18 | 1460 | A | 170    | 769,580   | 100   | 868,296   | 219    | 672,446   | 157   | 699,560   | 1.63  | 1.12E-09  | 2.78E-09  |
| RDN18 | 1474 | G | 1,906  | 769,580   | 1,422 | 868,296   | 1,460  | 672,446   | 923   | 699,560   | 1.57  | 0         | 0         |
| RDN18 | 1488 | G | 2,672  | 769,580   | 480   | 868,296   | 2,383  | 672,446   | 531   | 699,560   | 5.42  | 0         | 0         |
| RDN18 | 1490 | C | 1,316  | 769,580   | 331   | 868,296   | 947    | 672,446   | 843   | 699,560   | 2.08  | 0         | 0         |
| RDN18 | 1492 | A | 2,911  | 769,580   | 1,515 | 868,296   | 3,550  | 672,446   | 2,230 | 699,560   | 1.86  | 0         | 0         |
| RDN18 | 1493 | A | 686    | 769,580   | 153   | 868,296   | 1,007  | 672,446   | 453   | 699,560   | 2.99  | 0         | 0         |
| RDN18 | 1503 | A | 589    | 769,580   | 110   | 868,296   | 603    | 672,446   | 130   | 699,560   | 5.37  | 0         | 0         |
| RDN18 | 1507 | G | 593    | 769,580   | 367   | 868,296   | 753    | 672,446   | 457   | 699,560   | 1.76  | 0         | 0         |
| RDN18 | 1521 | G | 1,927  | 769,580   | 279   | 868,296   | 3,076  | 672,446   | 450   | 699,560   | 7.37  | 0         | 0         |
| RDN18 | 1556 | A | 2,085  | 769,580   | 1,224 | 868,296   | 2,589  | 672,446   | 1,443 | 699,560   | 1.89  | 0         | 0         |
| RDN18 | 1593 | A | 316    | 769,580   | 212   | 868,296   | 486    | 672,446   | 292   | 699,560   | 1.71  | 0         | 0         |
| RDN18 | 1638 | G | 262    | 769,580   | 156   | 868,296   | 354    | 672,446   | 263   | 699,560   | 1.58  | 3.89E-13  | 1.18E-12  |
| RDN18 | 1640 | C | 186    | 769,580   | 68    | 868,296   | 173    | 672,446   | 126   | 699,560   | 1.99  | 3.22E-15  | 1.08E-14  |
| RDN18 | 1651 | A | 405    | 769,580   | 242   | 868,296   | 409    | 672,446   | 198   | 699,560   | 2.01  | 0         | 0         |
| RDN18 | 1679 | G | 41     | 769,580   | 21    | 868,296   | 51     | 672,446   | 31    | 699,560   | 1.91  | 0.0002159 | 0.0003448 |
| RDN18 | 1681 | A | 12,042 | 769,580   | 826   | 868,296   | 7,179  | 672,446   | 848   | 699,560   | 12.49 | 0         | 0         |
| RDN18 | 1682 | T | 147    | 769,580   | 67    | 868,296   | 123    | 672,446   | 121   | 699,560   | 1.55  | 3.89E-06  | 7.12E-06  |
| RDN18 | 1689 | A | 319    | 769,580   | 244   | 868,296   | 280    | 672,446   | 182   | 699,560   | 1.53  | 1.77E-11  | 4.93E-11  |
| RDN18 | 1701 | A | 1,313  | 769,580   | 630   | 868,296   | 1,078  | 672,446   | 821   | 699,560   | 1.78  | 0         | 0         |
| RDN18 | 1702 | A | 282    | 769,580   | 96    | 868,296   | 273    | 672,446   | 202   | 699,560   | 2.00  | 0         | 0         |
| RDN18 | 1707 | A | 1,624  | 769,580   | 805   | 868,296   | 1,122  | 672,446   | 575   | 699,560   | 2.17  | 0         | 0         |
| RDN18 | 1712 | A | 536    | 769,580   | 58    | 868,296   | 406    | 672,446   | 83    | 699,560   | 7.23  | 0         | 0         |
| RDN18 | 1715 | G | 84     | 769,580   | 57    | 868,296   | 76     | 672,446   | 54    | 699,560   | 1.56  | 0.0003286 | 0.0005143 |
| RDN18 | 1720 | G | 351    | 769,580   | 121   | 868,296   | 170    | 672,446   | 98    | 699,560   | 2.60  | 0         | 0         |
| RDN18 | 1721 | A | 1,745  | 769,580   | 421   | 868,296   | 1,159  | 672,446   | 292   | 699,560   | 4.45  | 0         | 0         |
| RDN18 | 1722 | A | 1,048  | 769,580   | 448   | 868,296   | 690    | 672,446   | 436   | 699,560   | 2.14  | 0         | 0         |
| RDN18 | 1731 | A | 2,739  | 769,580   | 334   | 868,296   | 1,705  | 672,446   | 325   | 699,560   | 7.34  | 0         | 0         |
| RDN18 | 1749 | A | 99     | 769,580   | 21    | 868,296   | 24     | 672,446   | 8     | 699,560   | 4.69  | 2.22E-16  | 7.82E-16  |
| RDN18 | 1750 | A | 8      | 769,580   | 5     | 868,296   | 12     | 672,446   | 3     | 699,560   | 2.71  | 0.02231   | 0.02908   |
| RDN25 | 6    | A | 154    | 1,496,002 | 76    | 1,530,045 | 225    | 1,370,868 | 128   | 1,346,647 | 1.85  | 6.81E-13  | 1.86E-12  |
| RDN25 | 18   | G | 976    | 1,496,002 | 736   | 1,530,045 | 993    | 1,370,868 | 517   | 1,346,647 | 1.58  | 0         | 0         |
| RDN25 | 30   | G | 594    | 1,496,002 | 158   | 1,530,045 | 720    | 1,370,868 | 151   | 1,346,647 | 4.26  | 0         | 0         |
| RDN25 | 85   | A | 5,083  | 1,496,002 | 390   | 1,530,045 | 4,135  | 1,370,868 | 309   | 1,346,647 | 13.25 | 0         | 0         |
| RDN25 | 116  | A | 1,849  | 1,496     |       |           |        |           |       |           |       |           |           |

|       |      |   |        |           |       |           |        |           |       |           |       |           |          |
|-------|------|---|--------|-----------|-------|-----------|--------|-----------|-------|-----------|-------|-----------|----------|
| RDN25 | 256  | G | 461    | 1,496.002 | 170   | 1,530.045 | 455    | 1,370.868 | 303   | 1,346,647 | 1.94  | 0         | 0        |
| RDN25 | 285  | A | 627    | 1,496.002 | 291   | 1,530.045 | 450    | 1,370.868 | 323   | 1,346,647 | 1.76  | 0         | 0        |
| RDN25 | 348  | A | 7,600  | 1,496.002 | 2,791 | 1,530.045 | 2,700  | 1,370.868 | 959   | 1,346,647 | 2.78  | 0         | 0        |
| RDN25 | 366  | A | 3,532  | 1,496.002 | 715   | 1,530.045 | 994    | 1,370.868 | 363   | 1,346,647 | 4.25  | 0         | 0        |
| RDN25 | 372  | A | 1,951  | 1,496.002 | 694   | 1,530.045 | 510    | 1,370.868 | 255   | 1,346,647 | 2.63  | 0         | 0        |
| RDN25 | 378  | A | 745    | 1,496.002 | 298   | 1,530.045 | 318    | 1,370.868 | 205   | 1,346,647 | 2.13  | 0         | 0        |
| RDN25 | 385  | A | 1,696  | 1,496.002 | 1,147 | 1,530.045 | 864    | 1,370.868 | 552   | 1,346,647 | 1.52  | 0         | 0        |
| RDN25 | 390  | G | 767    | 1,496.002 | 404   | 1,530.045 | 498    | 1,370.868 | 189   | 1,346,647 | 2.15  | 0         | 0        |
| RDN25 | 402  | A | 597    | 1,496.002 | 229   | 1,530.045 | 352    | 1,370.868 | 155   | 1,346,647 | 2.49  | 0         | 0        |
| RDN25 | 423  | A | 116    | 1,496.002 | 34    | 1,530.045 | 100    | 1,370.868 | 58    | 1,346,647 | 2.35  | 2.15E-12  | 5.72E-12 |
| RDN25 | 436  | A | 176    | 1,496.002 | 93    | 1,530.045 | 170    | 1,370.868 | 95    | 1,346,647 | 1.85  | 8.93E-12  | 2.30E-11 |
| RDN25 | 437  | G | 5,567  | 1,496.002 | 1,450 | 1,530.045 | 4,305  | 1,370.868 | 1,171 | 1,346,647 | 3.78  | 0         | 0        |
| RDN25 | 438  | A | 650    | 1,496.002 | 138   | 1,530.045 | 585    | 1,370.868 | 138   | 1,346,647 | 4.49  | 0         | 0        |
| RDN25 | 439  | C | 6,300  | 1,496.002 | 1,878 | 1,530.045 | 4,636  | 1,370.868 | 3,025 | 1,346,647 | 2.23  | 0         | 0        |
| RDN25 | 440  | A | 1,223  | 1,496.002 | 305   | 1,530.045 | 1,118  | 1,370.868 | 260   | 1,346,647 | 4.16  | 0         | 0        |
| RDN25 | 442  | G | 194    | 1,496.002 | 99    | 1,530.045 | 227    | 1,370.868 | 161   | 1,346,647 | 1.62  | 9.07E-10  | 2.06E-09 |
| RDN25 | 443  | G | 361    | 1,496.002 | 201   | 1,530.045 | 444    | 1,370.868 | 188   | 1,346,647 | 2.07  | 0         | 0        |
| RDN25 | 450  | G | 310    | 1,496.002 | 155   | 1,530.045 | 564    | 1,370.868 | 176   | 1,346,647 | 2.64  | 0         | 0        |
| RDN25 | 453  | C | 563    | 1,496.002 | 99    | 1,530.045 | 669    | 1,370.868 | 256   | 1,346,647 | 3.46  | 0         | 0        |
| RDN25 | 477  | A | 3,222  | 1,496.002 | 753   | 1,530.045 | 2,881  | 1,370.868 | 701   | 1,346,647 | 4.21  | 0         | 0        |
| RDN25 | 478  | A | 1,591  | 1,496.002 | 844   | 1,530.045 | 1,458  | 1,370.868 | 694   | 1,346,647 | 1.99  | 0         | 0        |
| RDN25 | 480  | C | 5,948  | 1,496.002 | 1,315 | 1,530.045 | 3,813  | 1,370.868 | 1,259 | 1,346,647 | 3.81  | 0         | 0        |
| RDN25 | 490  | A | 270    | 1,496.002 | 163   | 1,530.045 | 263    | 1,370.868 | 192   | 1,346,647 | 1.50  | 2.42E-09  | 5.35E-09 |
| RDN25 | 495  | G | 274    | 1,496.002 | 155   | 1,530.045 | 294    | 1,370.868 | 187   | 1,346,647 | 1.66  | 7.64E-14  | 2.21E-13 |
| RDN25 | 499  | G | 147    | 1,496.002 | 70    | 1,530.045 | 153    | 1,370.868 | 85    | 1,346,647 | 1.94  | 1.33E-11  | 3.36E-11 |
| RDN25 | 511  | G | 333    | 1,496.002 | 214   | 1,530.045 | 274    | 1,370.868 | 141   | 1,346,647 | 1.72  | 3.33E-16  | 1.09E-15 |
| RDN25 | 514  | G | 230    | 1,496.002 | 107   | 1,530.045 | 187    | 1,370.868 | 132   | 1,346,647 | 1.75  | 3.71E-12  | 9.78E-12 |
| RDN25 | 521  | A | 661    | 1,496.002 | 174   | 1,530.045 | 443    | 1,370.868 | 172   | 1,346,647 | 3.21  | 0         | 0        |
| RDN25 | 522  | A | 1,095  | 1,496.002 | 565   | 1,530.045 | 886    | 1,370.868 | 364   | 1,346,647 | 2.14  | 0         | 0        |
| RDN25 | 523  | A | 3,924  | 1,496.002 | 741   | 1,530.045 | 2,778  | 1,370.868 | 472   | 1,346,647 | 5.56  | 0         | 0        |
| RDN25 | 537  | A | 647    | 1,496.002 | 66    | 1,530.045 | 811    | 1,370.868 | 113   | 1,346,647 | 8.13  | 0         | 0        |
| RDN25 | 546  | C | 408    | 1,496.002 | 33    | 1,530.045 | 321    | 1,370.868 | 65    | 1,346,647 | 7.44  | 0         | 0        |
| RDN25 | 547  | G | 288    | 1,496.002 | 129   | 1,530.045 | 283    | 1,370.868 | 147   | 1,346,647 | 2.07  | 0         | 0        |
| RDN25 | 548  | G | 795    | 1,496.002 | 515   | 1,530.045 | 831    | 1,370.868 | 426   | 1,346,647 | 1.73  | 0         | 0        |
| RDN25 | 572  | A | 510    | 1,496.002 | 82    | 1,530.045 | 596    | 1,370.868 | 148   | 1,346,647 | 4.80  | 0         | 0        |
| RDN25 | 579  | G | 691    | 1,496.002 | 128   | 1,530.045 | 582    | 1,370.868 | 105   | 1,346,647 | 5.49  | 0         | 0        |
| RDN25 | 592  | A | 306    | 1,496.002 | 42    | 1,530.045 | 385    | 1,370.868 | 66    | 1,346,647 | 6.39  | 0         | 0        |
| RDN25 | 593  | C | 662    | 1,496.002 | 52    | 1,530.045 | 486    | 1,370.868 | 135   | 1,346,647 | 6.14  | 0         | 0        |
| RDN25 | 597  | G | 463    | 1,496.002 | 264   | 1,530.045 | 389    | 1,370.868 | 264   | 1,346,647 | 1.62  | 0         | 0        |
| RDN25 | 598  | A | 32     | 1,496.002 | 13    | 1,530.045 | 58     | 1,370.868 | 36    | 1,346,647 | 1.83  | 0.0007661 | 0.001107 |
| RDN25 | 602  | A | 145    | 1,496.002 | 44    | 1,530.045 | 208    | 1,370.868 | 52    | 1,346,647 | 3.68  | 0         | 0        |
| RDN25 | 603  | A | 170    | 1,496.002 | 33    | 1,530.045 | 237    | 1,370.868 | 73    | 1,346,647 | 3.83  | 0         | 0        |
| RDN25 | 604  | G | 298    | 1,496.002 | 115   | 1,530.045 | 377    | 1,370.868 | 284   | 1,346,647 | 1.69  | 1.11E-16  | 3.74E-16 |
| RDN25 | 607  | A | 87     | 1,496.002 | 39    | 1,530.045 | 194    | 1,370.868 | 93    | 1,346,647 | 2.12  | 4.96E-13  | 1.37E-12 |
| RDN25 | 608  | A | 47     | 1,496.002 | 10    | 1,530.045 | 39     | 1,370.868 | 24    | 1,346,647 | 2.53  | 3.12E-06  | 5.48E-06 |
| RDN25 | 619  | A | 883    | 1,496.002 | 206   | 1,530.045 | 894    | 1,370.868 | 159   | 1,346,647 | 4.89  | 0         | 0        |
| RDN25 | 621  | A | 685    | 1,496.002 | 253   | 1,530.045 | 804    | 1,370.868 | 312   | 1,346,647 | 2.64  | 0         | 0        |
| RDN25 | 692  | A | 72,649 | 1,496.002 | 1,210 | 1,530.045 | 60,561 | 1,370.868 | 1,144 | 1,346,647 | 56.79 | 0         | 0        |
| RDN25 | 693  | A | 774    | 1,496.002 | 140   | 1,530.045 | 589    | 1,370.868 | 185   | 1,346,647 | 4.20  | 0         | 0        |
| RDN25 | 697  | A | 1,237  | 1,496.002 | 548   | 1,530.045 | 878    | 1,370.868 | 343   | 1,346,647 | 2.39  | 0         | 0        |
| RDN25 | 708  | G | 810    | 1,496.002 | 523   | 1,530.045 | 650    | 1,370.868 | 331   | 1,346,647 | 1.72  | 0         | 0        |
| RDN25 | 710  | A | 423    | 1,496.002 | 255   | 1,530.045 | 334    | 1,370.868 | 229   | 1,346,647 | 1.57  | 6.44E-15  | 1.98E-14 |
| RDN25 | 711  | A | 787    | 1,496.002 | 233   | 1,530.045 | 625    | 1,370.868 | 194   | 1,346,647 | 3.32  | 0         | 0        |
| RDN25 | 718  | G | 820    | 1,496.002 | 450   | 1,530.045 | 617    | 1,370.868 | 457   | 1,346,647 | 1.59  | 0         | 0        |
| RDN25 | 721  | G | 449    | 1,496.002 | 209   | 1,530.045 | 442    | 1,370.868 | 139   | 1,346,647 | 2.57  | 0         | 0        |
| RDN25 | 734  | C | 2,040  | 1,496.002 | 684   | 1,530.045 | 759    | 1,370.868 | 456   | 1,346,647 | 2.48  | 0         | 0        |
| RDN25 | 735  | A | 1,333  | 1,496.002 | 504   | 1,530.045 | 818    | 1,370.868 | 192   | 1,346,647 | 3.12  | 0         | 0        |
| RDN25 | 736  | A | 515    | 1,496.002 | 136   | 1,530.045 | 256    | 1,370.868 | 66    | 1,346,647 | 3.85  | 0         | 0        |
| RDN25 | 744  | A | 956    | 1,496.002 | 365   | 1,530.045 | 473    | 1,370.868 | 265   | 1,346,647 | 2.29  | 0         | 0        |
| RDN25 | 761  | A | 9,591  | 1,496.002 | 369   | 1,530.045 | 3,479  | 1,370.868 | 324   | 1,346,647 | 19.00 | 0         | 0        |
| RDN25 | 765  | C | 2,600  | 1,496.002 | 1,107 | 1,530.045 | 831    | 1,370.868 | 675   | 1,346,647 | 1.94  | 0         | 0        |
| RDN25 | 771  | A | 1,404  | 1,496.002 | 587   | 1,530.045 | 613    | 1,370.868 | 374   | 1,346,647 | 2.12  | 0         | 0        |
| RDN25 | 783  | A | 669    | 1,496.002 | 304   | 1,530.045 | 556    | 1,370.868 | 286   | 1,346,647 | 2.08  | 0         | 0        |
| RDN25 | 784  | A | 711    | 1,496.002 | 94    | 1,530.045 | 522    | 1,370.868 | 120   | 1,346,647 | 5.78  | 0         | 0        |
| RDN25 | 800  | G | 3,221  | 1,496.002 | 312   | 1,530.045 | 2,283  | 1,370.868 | 255   | 1,346,647 | 9.76  | 0         | 0        |
| RDN25 | 845  | G | 678    | 1,496.002 | 322   | 1,530.045 | 785    | 1,370.868 | 301   | 1,346,647 | 2.35  | 0         | 0        |
| RDN25 | 846  | A | 2,471  | 1,496.002 | 354   | 1,530.045 | 2,069  | 1,370.868 | 385   | 1,346,647 | 6.16  | 0         | 0        |
| RDN25 | 848  | A | 2,367  | 1,496.002 | 117   | 1,530.045 | 2,226  | 1,370.868 | 202   | 1,346,647 | 14.40 | 0         | 0        |
| RDN25 | 877  | C | 3,848  | 1,496.002 | 176   | 1,530.045 | 2,330  | 1,370.868 | 187   | 1,346,647 | 17.10 | 0         | 0        |
| RDN25 | 882  | A | 544    | 1,496.002 | 243   | 1,530.045 | 288    | 1,370.868 | 222   | 1,346,647 | 1.80  | 0         | 0        |
| RDN25 | 883  | A | 2,330  | 1,496.002 | 981   | 1,530.045 | 1,518  | 1,370.868 | 619   | 1,346,647 | 2.42  | 0         | 0        |
| RDN25 | 887  | G | 1,049  | 1,496.002 | 321   | 1,530.045 | 818    | 1,370.868 | 390   | 1,346,647 | 2.63  | 0         | 0        |
| RDN25 | 891  | G | 3,703  | 1,496.002 | 1,322 | 1,530.045 | 2,580  | 1,370.868 | 733   | 1,346,647 | 3.08  | 0         | 0        |
| RDN25 | 895  | A | 2,400  | 1,496.002 | 758   | 1,530.045 | 1,691  | 1,370.868 | 526   | 1,346,647 | 3.21  | 0         | 0        |
| RDN25 | 959  | C | 8,481  | 1,496.002 | 1,435 | 1,530.045 | 2,765  | 1,370.868 | 925   | 1,346,647 | 4.81  | 0         | 0        |
| RDN25 | 978  | G | 565    | 1,496.002 | 270   | 1,530.045 | 466    | 1,370.868 | 224   | 1,346,647 | 2.10  | 0         | 0        |
| RDN25 | 980  | A | 7,098  | 1,496.002 | 1,117 | 1,530.045 | 2,985  | 1,370.868 | 552   | 1,346,647 | 6.10  | 0         | 0        |
| RDN25 | 1025 | A | 2,463  | 1,496.002 | 960   | 1,530.045 | 1,669  | 1,370.868 | 539   | 1,346,647 | 2.78  | 0         | 0        |
| RDN25 | 1026 | A | 5,319  | 1,496.002 | 2,049 | 1,530.045 | 3,425  | 1,370.868 | 1,189 | 1,346,647 | 2.72  | 0         | 0        |
| RDN25 | 1027 | A | 1,532  | 1,496.002 | 794   | 1,530.045 | 1,200  | 1,370.868 | 593   | 1,346,647 | 1.98  | 0         | 0        |
| RDN25 | 1036 | A | 416    | 1,496.002 | 194   | 1,530.045 | 308    | 1,370.868 | 133   | 1,346,647 | 2.23  | 0         | 0        |
| RDN25 | 1055 | A | 1,316  | 1,496.002 | 494   | 1,530.045 | 453    | 1,370.868 | 186   | 1,346,647 | 2.63  | 0         | 0        |
| RDN25 | 1064 | A | 407    | 1,496.002 | 183   | 1,530.045 | 274    | 1,370.868 | 153   | 1,346,647 | 2.04  | 0         | 0        |
| RDN25 | 1079 | A | 14,255 | 1,496.002 | 2,718 | 1,530.045 | 5,289  | 1,370.868 | 932   | 1,346,647 | 5.42  | 0         | 0        |
| RDN25 | 1091 | A | 577    | 1,496.002 | 318   | 1,530.045 | 384    | 1,370.868 | 292   | 1,346,647 | 1.58  | 0         | 0        |
| RDN25 | 1102 | A | 1,508  | 1,496.002 | 247   | 1,530.045 | 690    | 1,370.868 | 214   | 1,346,647 | 4.80  | 0         | 0        |
| RDN25 | 1103 | A | 202    | 1,496.002 | 80    | 1,530.045 | 101    | 1,370.868 | 96    | 1,346,647 | 1.73  | 5.82E-09  | 1.25E-08 |
| RDN25 | 1105 | A | 210    | 1,496.002 | 133   | 1,530.045 | 123    | 1,370.868 | 88    | 1,346,647 | 1.52  | 1.59E-06  | 2.86E-06 |
| RDN25 | 1136 | A | 1,789  | 1,496.002 | 235   | 1,530.045 | 1,280  | 1,370.868 | 394   | 1,346,647 | 4.89  |           |          |

|       |      |   |       |           |       |           |       |           |       |           |       |           |           |
|-------|------|---|-------|-----------|-------|-----------|-------|-----------|-------|-----------|-------|-----------|-----------|
| RDN25 | 1350 | A | 3,590 | 1,496.002 | 614   | 1,530.045 | 3,089 | 1,370.868 | 538   | 1,346,647 | 5.82  | 0         | 0         |
| RDN25 | 1352 | A | 1,524 | 1,496.002 | 316   | 1,530.045 | 1,256 | 1,370.868 | 438   | 1,346,647 | 3.69  | 0         | 0         |
| RDN25 | 1354 | G | 734   | 1,496.002 | 519   | 1,530.045 | 819   | 1,370.868 | 465   | 1,346,647 | 1.58  | 0         | 0         |
| RDN25 | 1355 | A | 650   | 1,496.002 | 139   | 1,530.045 | 739   | 1,370.868 | 150   | 1,346,647 | 4.81  | 0         | 0         |
| RDN25 | 1363 | A | 160   | 1,496.002 | 81    | 1,530.045 | 185   | 1,370.868 | 116   | 1,346,647 | 1.75  | 2.69E-10  | 6.28E-10  |
| RDN25 | 1366 | A | 572   | 1,496.002 | 108   | 1,530.045 | 652   | 1,370.868 | 182   | 1,346,647 | 4.22  | 0         | 0         |
| RDN25 | 1375 | G | 226   | 1,496.002 | 26    | 1,530.045 | 255   | 1,370.868 | 43    | 1,346,647 | 6.97  | 0         | 0         |
| RDN25 | 1383 | G | 2,189 | 1,496.002 | 553   | 1,530.045 | 1,807 | 1,370.868 | 571   | 1,346,647 | 3.57  | 0         | 0         |
| RDN25 | 1386 | A | 299   | 1,496.002 | 150   | 1,530.045 | 269   | 1,370.868 | 161   | 1,346,647 | 1.83  | 0         | 0         |
| RDN25 | 1400 | G | 875   | 1,496.002 | 241   | 1,530.045 | 707   | 1,370.868 | 338   | 1,346,647 | 2.74  | 0         | 0         |
| RDN25 | 1401 | A | 242   | 1,496.002 | 90    | 1,530.045 | 162   | 1,370.868 | 121   | 1,346,647 | 1.92  | 6.66E-15  | 2.05E-14  |
| RDN25 | 1408 | G | 91    | 1,496.002 | 37    | 1,530.045 | 94    | 1,370.868 | 73    | 1,346,647 | 1.68  | 1.66E-05  | 2.76E-05  |
| RDN25 | 1409 | G | 1,026 | 1,496.002 | 435   | 1,530.045 | 654   | 1,370.868 | 437   | 1,346,647 | 1.94  | 0         | 0         |
| RDN25 | 1421 | G | 741   | 1,496.002 | 40    | 1,530.045 | 844   | 1,370.868 | 60    | 1,346,647 | 15.85 | 0         | 0         |
| RDN25 | 1449 | A | 105   | 1,496.002 | 49    | 1,530.045 | 28    | 1,370.868 | 11    | 1,346,647 | 2.25  | 1.27E-07  | 2.50E-07  |
| RDN25 | 1465 | A | 121   | 1,496.002 | 63    | 1,530.045 | 113   | 1,370.868 | 85    | 1,346,647 | 1.58  | 1.27E-05  | 2.14E-05  |
| RDN25 | 1503 | A | 5,879 | 1,496.002 | 1,541 | 1,530.045 | 4,075 | 1,370.868 | 1,062 | 1,346,647 | 3.85  | 0         | 0         |
| RDN25 | 1519 | G | 78    | 1,496.002 | 35    | 1,530.045 | 70    | 1,370.868 | 30    | 1,346,647 | 2.29  | 1.65E-08  | 3.45E-08  |
| RDN25 | 1520 | G | 249   | 1,496.002 | 134   | 1,530.045 | 235   | 1,370.868 | 142   | 1,346,647 | 1.76  | 4.60E-14  | 1.35E-13  |
| RDN25 | 1521 | G | 4,319 | 1,496.002 | 814   | 1,530.045 | 4,106 | 1,370.868 | 675   | 1,346,647 | 5.68  | 0         | 0         |
| RDN25 | 1539 | A | 787   | 1,496.002 | 316   | 1,530.045 | 662   | 1,370.868 | 508   | 1,346,647 | 1.76  | 0         | 0         |
| RDN25 | 1545 | A | 165   | 1,496.002 | 46    | 1,530.045 | 220   | 1,370.868 | 113   | 1,346,647 | 2.41  | 0         | 0         |
| RDN25 | 1557 | A | 178   | 1,496.002 | 101   | 1,530.045 | 95    | 1,370.868 | 78    | 1,346,647 | 1.54  | 8.61E-06  | 1.47E-05  |
| RDN25 | 1561 | G | 187   | 1,496.002 | 137   | 1,530.045 | 246   | 1,370.868 | 115   | 1,346,647 | 1.72  | 5.44E-12  | 1.42E-11  |
| RDN25 | 1566 | A | 1,242 | 1,496.002 | 596   | 1,530.045 | 1,340 | 1,370.868 | 524   | 1,346,647 | 2.31  | 0         | 0         |
| RDN25 | 1571 | A | 695   | 1,496.002 | 192   | 1,530.045 | 858   | 1,370.868 | 246   | 1,346,647 | 3.55  | 0         | 0         |
| RDN25 | 1576 | G | 44    | 1,496.002 | 17    | 1,530.045 | 92    | 1,370.868 | 61    | 1,346,647 | 1.73  | 0.000118  | 0.0001831 |
| RDN25 | 1577 | G | 165   | 1,496.002 | 76    | 1,530.045 | 254   | 1,370.868 | 112   | 1,346,647 | 2.23  | 0         | 0         |
| RDN25 | 1580 | A | 585   | 1,496.002 | 211   | 1,530.045 | 779   | 1,370.868 | 269   | 1,346,647 | 2.84  | 0         | 0         |
| RDN25 | 1583 | A | 2,198 | 1,496.002 | 941   | 1,530.045 | 1,534 | 1,370.868 | 763   | 1,346,647 | 2.20  | 0         | 0         |
| RDN25 | 1604 | G | 1,151 | 1,496.002 | 429   | 1,530.045 | 1,349 | 1,370.868 | 666   | 1,346,647 | 2.28  | 0         | 0         |
| RDN25 | 1652 | G | 60    | 1,496.002 | 32    | 1,530.045 | 155   | 1,370.868 | 103   | 1,346,647 | 1.58  | 3.25E-05  | 5.27E-05  |
| RDN25 | 1656 | A | 842   | 1,496.002 | 87    | 1,530.045 | 1,298 | 1,370.868 | 156   | 1,346,647 | 8.78  | 0         | 0         |
| RDN25 | 1658 | G | 1,347 | 1,496.002 | 817   | 1,530.045 | 1,635 | 1,370.868 | 1,118 | 1,346,647 | 1.54  | 0         | 0         |
| RDN25 | 1674 | G | 51    | 1,496.002 | 28    | 1,530.045 | 46    | 1,370.868 | 32    | 1,346,647 | 1.62  | 0.003869  | 0.005222  |
| RDN25 | 1683 | A | 1,401 | 1,496.002 | 723   | 1,530.045 | 1,692 | 1,370.868 | 860   | 1,346,647 | 1.96  | 0         | 0         |
| RDN25 | 1704 | A | 3,246 | 1,496.002 | 853   | 1,530.045 | 3,339 | 1,370.868 | 1,180 | 1,346,647 | 3.24  | 0         | 0         |
| RDN25 | 1727 | G | 42    | 1,496.002 | 24    | 1,530.045 | 59    | 1,370.868 | 40    | 1,346,647 | 1.58  | 0.005242  | 0.006953  |
| RDN25 | 1731 | A | 974   | 1,496.002 | 255   | 1,530.045 | 954   | 1,370.868 | 481   | 1,346,647 | 2.62  | 0         | 0         |
| RDN25 | 1741 | A | 1,144 | 1,496.002 | 196   | 1,530.045 | 2,175 | 1,370.868 | 592   | 1,346,647 | 4.19  | 0         | 0         |
| RDN25 | 1757 | A | 197   | 1,496.002 | 133   | 1,530.045 | 266   | 1,370.868 | 166   | 1,346,647 | 1.55  | 3.64E-09  | 7.98E-09  |
| RDN25 | 1758 | G | 458   | 1,496.002 | 123   | 1,530.045 | 602   | 1,370.868 | 282   | 1,346,647 | 2.61  | 0         | 0         |
| RDN25 | 1760 | A | 2,158 | 1,496.002 | 229   | 1,530.045 | 3,363 | 1,370.868 | 442   | 1,346,647 | 8.20  | 0         | 0         |
| RDN25 | 1761 | C | 2,670 | 1,496.002 | 244   | 1,530.045 | 2,237 | 1,370.868 | 532   | 1,346,647 | 6.32  | 0         | 0         |
| RDN25 | 1769 | G | 76    | 1,496.002 | 52    | 1,530.045 | 125   | 1,370.868 | 69    | 1,346,647 | 1.66  | 1.15E-05  | 1.94E-05  |
| RDN25 | 1770 | G | 110   | 1,496.002 | 93    | 1,530.045 | 168   | 1,370.868 | 91    | 1,346,647 | 1.51  | 1.52E-05  | 2.54E-05  |
| RDN25 | 1775 | G | 79    | 1,496.002 | 33    | 1,530.045 | 182   | 1,370.868 | 112   | 1,346,647 | 1.79  | 1.70E-08  | 3.54E-08  |
| RDN25 | 1776 | G | 300   | 1,496.002 | 139   | 1,530.045 | 562   | 1,370.868 | 300   | 1,346,647 | 1.96  | 0         | 0         |
| RDN25 | 1809 | A | 853   | 1,496.002 | 275   | 1,530.045 | 979   | 1,370.868 | 260   | 1,346,647 | 3.43  | 0         | 0         |
| RDN25 | 1811 | G | 152   | 1,496.002 | 49    | 1,530.045 | 199   | 1,370.868 | 102   | 1,346,647 | 2.32  | 0         | 0         |
| RDN25 | 1813 | A | 5,254 | 1,496.002 | 1,443 | 1,530.045 | 4,147 | 1,370.868 | 1,045 | 1,346,647 | 3.80  | 0         | 0         |
| RDN25 | 1814 | A | 3,244 | 1,496.002 | 1,022 | 1,530.045 | 2,671 | 1,370.868 | 814   | 1,346,647 | 3.24  | 0         | 0         |
| RDN25 | 1842 | A | 654   | 1,496.002 | 406   | 1,530.045 | 534   | 1,370.868 | 259   | 1,346,647 | 1.80  | 0         | 0         |
| RDN25 | 1847 | A | 1,548 | 1,496.002 | 297   | 1,530.045 | 829   | 1,370.868 | 256   | 1,346,647 | 4.33  | 0         | 0         |
| RDN25 | 1879 | A | 3,800 | 1,496.002 | 884   | 1,530.045 | 1,188 | 1,370.868 | 317   | 1,346,647 | 4.21  | 0         | 0         |
| RDN25 | 1887 | A | 1,015 | 1,496.002 | 410   | 1,530.045 | 545   | 1,370.868 | 232   | 1,346,647 | 2.45  | 0         | 0         |
| RDN25 | 1913 | A | 137   | 1,496.002 | 66    | 1,530.045 | 93    | 1,370.868 | 77    | 1,346,647 | 1.61  | 7.03E-06  | 1.21E-05  |
| RDN25 | 1928 | G | 105   | 1,496.002 | 51    | 1,530.045 | 57    | 1,370.868 | 49    | 1,346,647 | 1.63  | 0.0001341 | 0.000207  |
| RDN25 | 1930 | A | 5,227 | 1,496.002 | 1,004 | 1,530.045 | 2,182 | 1,370.868 | 515   | 1,346,647 | 4.93  | 0         | 0         |
| RDN25 | 1932 | A | 925   | 1,496.002 | 207   | 1,530.045 | 494   | 1,370.868 | 182   | 1,346,647 | 3.67  | 0         | 0         |
| RDN25 | 1933 | A | 192   | 1,496.002 | 36    | 1,530.045 | 103   | 1,370.868 | 32    | 1,346,647 | 4.36  | 0         | 0         |
| RDN25 | 1949 | G | 1,191 | 1,496.002 | 625   | 1,530.045 | 895   | 1,370.868 | 712   | 1,346,647 | 1.57  | 0         | 0         |
| RDN25 | 1952 | G | 76    | 1,496.002 | 40    | 1,530.045 | 78    | 1,370.868 | 49    | 1,346,647 | 1.73  | 3.84E-05  | 6.20E-05  |
| RDN25 | 1953 | G | 401   | 1,496.002 | 177   | 1,530.045 | 391   | 1,370.868 | 187   | 1,346,647 | 2.18  | 0         | 0         |
| RDN25 | 1957 | G | 605   | 1,496.002 | 345   | 1,530.045 | 620   | 1,370.868 | 399   | 1,346,647 | 1.65  | 0         | 0         |
| RDN25 | 1969 | G | 2,100 | 1,496.002 | 706   | 1,530.045 | 1,498 | 1,370.868 | 651   | 1,346,647 | 2.66  | 0         | 0         |
| RDN25 | 1974 | A | 664   | 1,496.002 | 89    | 1,530.045 | 601   | 1,370.868 | 119   | 1,346,647 | 6.09  | 0         | 0         |
| RDN25 | 1979 | G | 102   | 1,496.002 | 36    | 1,530.045 | 131   | 1,370.868 | 62    | 1,346,647 | 2.37  | 1.89E-13  | 5.35E-13  |
| RDN25 | 1985 | G | 356   | 1,496.002 | 84    | 1,530.045 | 364   | 1,370.868 | 106   | 1,346,647 | 3.79  | 0         | 0         |
| RDN25 | 1987 | G | 140   | 1,496.002 | 98    | 1,530.045 | 115   | 1,370.868 | 59    | 1,346,647 | 1.63  | 1.34E-06  | 2.42E-06  |
| RDN25 | 1991 | G | 193   | 1,496.002 | 75    | 1,530.045 | 205   | 1,370.868 | 97    | 1,346,647 | 2.32  | 0         | 0         |
| RDN25 | 1993 | G | 20    | 1,496.002 | 22    | 1,530.045 | 71    | 1,370.868 | 37    | 1,346,647 | 1.53  | 0.01273   | 0.01621   |
| RDN25 | 1994 | G | 680   | 1,496.002 | 329   | 1,530.045 | 770   | 1,370.868 | 302   | 1,346,647 | 2.30  | 0         | 0         |
| RDN25 | 1995 | A | 436   | 1,496.002 | 123   | 1,530.045 | 605   | 1,370.868 | 65    | 1,346,647 | 5.56  | 0         | 0         |
| RDN25 | 1998 | G | 112   | 1,496.002 | 77    | 1,530.045 | 166   | 1,370.868 | 107   | 1,346,647 | 1.51  | 1.61E-05  | 2.69E-05  |
| RDN25 | 2003 | G | 675   | 1,496.002 | 183   | 1,530.045 | 851   | 1,370.868 | 448   | 1,346,647 | 2.41  | 0         | 0         |
| RDN25 | 2012 | G | 209   | 1,496.002 | 101   | 1,530.045 | 407   | 1,370.868 | 245   | 1,346,647 | 1.77  | 0         | 0         |
| RDN25 | 2022 | G | 112   | 1,496.002 | 45    | 1,530.045 | 148   | 1,370.868 | 110   | 1,346,647 | 1.67  | 3.79E-07  | 7.20E-07  |
| RDN25 | 2024 | G | 50    | 1,496.002 | 19    | 1,530.045 | 142   | 1,370.868 | 90    | 1,346,647 | 1.75  | 3.29E-06  | 5.78E-06  |
| RDN25 | 2025 | G | 943   | 1,496.002 | 647   | 1,530.045 | 1,318 | 1,370.868 | 655   | 1,346,647 | 1.74  | 0         | 0         |
| RDN25 | 2026 | A | 549   | 1,496.002 | 147   | 1,530.045 | 1,161 | 1,370.868 | 207   | 1,346,647 | 4.82  | 0         | 0         |
| RDN25 | 2035 | G | 192   | 1,496.002 | 52    | 1,530.045 | 384   | 1,370.868 | 128   | 1,346,647 | 3.18  | 0         | 0         |
| RDN25 | 2042 | G | 2,191 | 1,496.002 | 877   | 1,530.045 | 2,540 | 1,370.868 | 1,020 | 1,346,647 | 2.50  | 0         | 0         |
| RDN25 | 2049 | A | 385   | 1,496.002 | 74    | 1,530.045 | 618   | 1,370.868 | 183   | 1,346,647 | 3.89  | 0         | 0         |
| RDN25 | 2058 | G | 727   | 1,496.002 | 339   | 1,530.045 | 887   | 1,370.868 | 638   | 1,346,647 | 1.65  | 0         | 0         |
| RDN25 | 2062 | G | 527   | 1,496.002 | 457   | 1,530.045 | 766   | 1,370.868 | 403   | 1,346,647 | 1.51  | 0         | 0         |
| RDN25 | 2088 | A | 3,474 | 1,496.002 | 756   | 1,530.045 | 2,988 | 1,370.868 | 518   | 1,346,647 | 5.10  | 0         | 0         |
| RDN25 | 2089 | A | 1,491 | 1,496.002 | 650   | 1,530.045 | 1,129 | 1,370.868 | 422   | 1,346,6   |       |           |           |

|       |      |   |        |           |       |           |        |           |       |           |       |          |          |
|-------|------|---|--------|-----------|-------|-----------|--------|-----------|-------|-----------|-------|----------|----------|
| RDN25 | 2257 | C | 5,535  | 1,496,002 | 577   | 1,530,045 | 6,609  | 1,370,868 | 1,058 | 1,346,647 | 7.42  | 0        | 0        |
| RDN25 | 2272 | G | 257    | 1,496,002 | 148   | 1,530,045 | 503    | 1,370,868 | 222   | 1,346,647 | 2.05  | 0        | 0        |
| RDN25 | 2279 | A | 744    | 1,496,002 | 360   | 1,530,045 | 1,130  | 1,370,868 | 690   | 1,346,647 | 1.78  | 0        | 0        |
| RDN25 | 2284 | C | 381    | 1,496,002 | 137   | 1,530,045 | 608    | 1,370,868 | 383   | 1,346,647 | 1.89  | 0        | 0        |
| RDN25 | 2357 | A | 9,920  | 1,496,002 | 875   | 1,530,045 | 9,615  | 1,370,868 | 882   | 1,346,647 | 11.15 | 0        | 0        |
| RDN25 | 2386 | A | 9,720  | 1,496,002 | 1,335 | 1,530,045 | 5,848  | 1,370,868 | 975   | 1,346,647 | 6.78  | 0        | 0        |
| RDN25 | 2398 | A | 1,931  | 1,496,002 | 537   | 1,530,045 | 971    | 1,370,868 | 261   | 1,346,647 | 3.67  | 0        | 0        |
| RDN25 | 2401 | A | 2,436  | 1,496,002 | 188   | 1,530,045 | 1,328  | 1,370,868 | 170   | 1,346,647 | 10.58 | 0        | 0        |
| RDN25 | 2404 | A | 1,616  | 1,496,002 | 167   | 1,530,045 | 1,071  | 1,370,868 | 131   | 1,346,647 | 9.07  | 0        | 0        |
| RDN25 | 2412 | G | 539    | 1,496,002 | 191   | 1,530,045 | 346    | 1,370,868 | 101   | 1,346,647 | 3.05  | 0        | 0        |
| RDN25 | 2458 | A | 5,537  | 1,496,002 | 2,472 | 1,530,045 | 2,826  | 1,370,868 | 1,394 | 1,346,647 | 2.18  | 0        | 0        |
| RDN25 | 2477 | G | 754    | 1,496,002 | 308   | 1,530,045 | 740    | 1,370,868 | 445   | 1,346,647 | 1.99  | 0        | 0        |
| RDN25 | 2478 | C | 877    | 1,496,002 | 243   | 1,530,045 | 478    | 1,370,868 | 202   | 1,346,647 | 3.06  | 0        | 0        |
| RDN25 | 2479 | C | 1,638  | 1,496,002 | 404   | 1,530,045 | 1,031  | 1,370,868 | 287   | 1,346,647 | 3.89  | 0        | 0        |
| RDN25 | 2480 | A | 965    | 1,496,002 | 291   | 1,530,045 | 884    | 1,370,868 | 213   | 1,346,647 | 3.69  | 0        | 0        |
| RDN25 | 2486 | A | 3,228  | 1,496,002 | 670   | 1,530,045 | 2,616  | 1,370,868 | 638   | 1,346,647 | 4.48  | 0        | 0        |
| RDN25 | 2502 | A | 390    | 1,496,002 | 152   | 1,530,045 | 344    | 1,370,868 | 97    | 1,346,647 | 2.96  | 0        | 0        |
| RDN25 | 2523 | A | 313    | 1,496,002 | 115   | 1,530,045 | 293    | 1,370,868 | 77    | 1,346,647 | 3.17  | 0        | 0        |
| RDN25 | 2530 | G | 192    | 1,496,002 | 132   | 1,530,045 | 235    | 1,370,868 | 143   | 1,346,647 | 1.55  | 1.13E-08 | 2.39E-08 |
| RDN25 | 2531 | C | 754    | 1,496,002 | 277   | 1,530,045 | 457    | 1,370,868 | 301   | 1,346,647 | 2.10  | 0        | 0        |
| RDN25 | 2539 | C | 3,232  | 1,496,002 | 2,024 | 1,530,045 | 3,338  | 1,370,868 | 2,228 | 1,346,647 | 1.55  | 0        | 0        |
| RDN25 | 2554 | A | 339    | 1,496,002 | 222   | 1,530,045 | 346    | 1,370,868 | 152   | 1,346,647 | 1.84  | 0        | 0        |
| RDN25 | 2556 | C | 2,424  | 1,496,002 | 737   | 1,530,045 | 1,435  | 1,370,868 | 788   | 1,346,647 | 2.54  | 0        | 0        |
| RDN25 | 2557 | A | 1,685  | 1,496,002 | 960   | 1,530,045 | 1,304  | 1,370,868 | 745   | 1,346,647 | 1.76  | 0        | 0        |
| RDN25 | 2562 | A | 109    | 1,496,002 | 33    | 1,530,045 | 91     | 1,370,868 | 68    | 1,346,647 | 1.98  | 1.52E-08 | 3.18E-08 |
| RDN25 | 2569 | A | 3,909  | 1,496,002 | 810   | 1,530,045 | 2,220  | 1,370,868 | 571   | 1,346,647 | 4.47  | 0        | 0        |
| RDN25 | 2580 | A | 1,710  | 1,496,002 | 757   | 1,530,045 | 872    | 1,370,868 | 583   | 1,346,647 | 1.94  | 0        | 0        |
| RDN25 | 2638 | C | 863    | 1,496,002 | 79    | 1,530,045 | 792    | 1,370,868 | 89    | 1,346,647 | 9.87  | 0        | 0        |
| RDN25 | 2640 | A | 1,277  | 1,496,002 | 668   | 1,530,045 | 637    | 1,370,868 | 289   | 1,346,647 | 2.02  | 0        | 0        |
| RDN25 | 2667 | A | 2,314  | 1,496,002 | 407   | 1,530,045 | 1,687  | 1,370,868 | 445   | 1,346,647 | 4.71  | 0        | 0        |
| RDN25 | 2671 | A | 88     | 1,496,002 | 63    | 1,530,045 | 66     | 1,370,868 | 39    | 1,346,647 | 1.52  | 0.001215 | 0.001719 |
| RDN25 | 2675 | C | 2,867  | 1,496,002 | 702   | 1,530,045 | 1,849  | 1,370,868 | 622   | 1,346,647 | 3.58  | 0        | 0        |
| RDN25 | 2678 | A | 1,150  | 1,496,002 | 271   | 1,530,045 | 1,039  | 1,370,868 | 307   | 1,346,647 | 3.80  | 0        | 0        |
| RDN25 | 2679 | A | 1,697  | 1,496,002 | 772   | 1,530,045 | 1,440  | 1,370,868 | 686   | 1,346,647 | 2.16  | 0        | 0        |
| RDN25 | 2680 | A | 9,589  | 1,496,002 | 827   | 1,530,045 | 8,476  | 1,370,868 | 681   | 1,346,647 | 12.03 | 0        | 0        |
| RDN25 | 2683 | T | 282    | 1,496,002 | 173   | 1,530,045 | 378    | 1,370,868 | 257   | 1,346,647 | 1.53  | 4.53E-12 | 1.19E-11 |
| RDN25 | 2689 | A | 781    | 1,496,002 | 77    | 1,530,045 | 671    | 1,370,868 | 52    | 1,346,647 | 11.31 | 0        | 0        |
| RDN25 | 2702 | A | 1,185  | 1,496,002 | 318   | 1,530,045 | 573    | 1,370,868 | 379   | 1,346,647 | 2.54  | 0        | 0        |
| RDN25 | 2720 | G | 811    | 1,496,002 | 461   | 1,530,045 | 586    | 1,370,868 | 377   | 1,346,647 | 1.68  | 0        | 0        |
| RDN25 | 2764 | C | 823    | 1,496,002 | 58    | 1,530,045 | 697    | 1,370,868 | 46    | 1,346,647 | 14.68 | 0        | 0        |
| RDN25 | 2769 | A | 117    | 1,496,002 | 71    | 1,530,045 | 119    | 1,370,868 | 81    | 1,346,647 | 1.56  | 2.33E-05 | 3.82E-05 |
| RDN25 | 2770 | G | 361    | 1,496,002 | 235   | 1,530,045 | 295    | 1,370,868 | 167   | 1,346,647 | 1.64  | 3.89E-15 | 1.21E-14 |
| RDN25 | 2772 | C | 300    | 1,496,002 | 27    | 1,530,045 | 200    | 1,370,868 | 46    | 1,346,647 | 6.86  | 0        | 0        |
| RDN25 | 2787 | G | 207    | 1,496,002 | 171   | 1,530,045 | 343    | 1,370,868 | 143   | 1,346,647 | 1.75  | 1.33E-15 | 4.23E-15 |
| RDN25 | 2821 | C | 541    | 1,496,002 | 94    | 1,530,045 | 605    | 1,370,868 | 448   | 1,346,647 | 2.10  | 0        | 0        |
| RDN25 | 2838 | A | 970    | 1,496,002 | 123   | 1,530,045 | 1,134  | 1,370,868 | 232   | 1,346,647 | 5.92  | 0        | 0        |
| RDN25 | 2847 | A | 2,211  | 1,496,002 | 205   | 1,530,045 | 2,299  | 1,370,868 | 311   | 1,346,647 | 8.74  | 0        | 0        |
| RDN25 | 2872 | A | 242    | 1,496,002 | 115   | 1,530,045 | 557    | 1,370,868 | 369   | 1,346,647 | 1.64  | 0        | 0        |
| RDN25 | 2946 | A | 18,519 | 1,496,002 | 223   | 1,530,045 | 19,583 | 1,370,868 | 268   | 1,346,647 | 77.69 | 0        | 0        |
| RDN25 | 2947 | G | 456    | 1,496,002 | 188   | 1,530,045 | 475    | 1,370,868 | 246   | 1,346,647 | 2.15  | 0        | 0        |
| RDN25 | 2971 | A | 49     | 1,496,002 | 29    | 1,530,045 | 46     | 1,370,868 | 29    | 1,346,647 | 1.64  | 0.003418 | 0.004646 |
| RDN25 | 3003 | G | 113    | 1,496,002 | 75    | 1,530,045 | 141    | 1,370,868 | 63    | 1,346,647 | 1.84  | 5.77E-09 | 1.25E-08 |
| RDN25 | 3006 | A | 21,992 | 1,496,002 | 652   | 1,530,045 | 12,557 | 1,370,868 | 398   | 1,346,647 | 33.15 | 0        | 0        |
| RDN25 | 3007 | T | 310    | 1,496,002 | 100   | 1,530,045 | 159    | 1,370,868 | 78    | 1,346,647 | 2.65  | 0        | 0        |
| RDN25 | 3021 | A | 272    | 1,496,002 | 123   | 1,530,045 | 358    | 1,370,868 | 145   | 1,346,647 | 2.35  | 0        | 0        |
| RDN25 | 3022 | G | 690    | 1,496,002 | 331   | 1,530,045 | 708    | 1,370,868 | 453   | 1,346,647 | 1.78  | 0        | 0        |
| RDN25 | 3027 | A | 173    | 1,496,002 | 74    | 1,530,045 | 233    | 1,370,868 | 137   | 1,346,647 | 1.92  | 6.77E-15 | 2.08E-14 |
| RDN25 | 3072 | C | 1,040  | 1,496,002 | 213   | 1,530,045 | 1,089  | 1,370,868 | 344   | 1,346,647 | 3.82  | 0        | 0        |
| RDN25 | 3074 | G | 186    | 1,496,002 | 110   | 1,530,045 | 305    | 1,370,868 | 173   | 1,346,647 | 1.73  | 1.29E-13 | 3.69E-13 |
| RDN25 | 3114 | A | 251    | 1,496,002 | 136   | 1,530,045 | 263    | 1,370,868 | 123   | 1,346,647 | 1.99  | 0        | 0        |
| RDN25 | 3117 | C | 483    | 1,496,002 | 82    | 1,530,045 | 354    | 1,370,868 | 134   | 1,346,647 | 3.88  | 0        | 0        |
| RDN25 | 3141 | A | 8,984  | 1,496,002 | 1,093 | 1,530,045 | 5,317  | 1,370,868 | 650   | 1,346,647 | 8.27  | 0        | 0        |
| RDN25 | 3142 | A | 187    | 1,496,002 | 82    | 1,530,045 | 180    | 1,370,868 | 81    | 1,346,647 | 2.26  | 0        | 0        |
| RDN25 | 3143 | C | 272    | 1,496,002 | 122   | 1,530,045 | 232    | 1,370,868 | 166   | 1,346,647 | 1.75  | 1.71E-14 | 5.13E-14 |
| RDN25 | 3146 | G | 141    | 1,496,002 | 55    | 1,530,045 | 154    | 1,370,868 | 66    | 1,346,647 | 2.44  | 0        | 0        |
| RDN25 | 3152 | T | 1,360  | 1,496,002 | 635   | 1,530,045 | 945    | 1,370,868 | 659   | 1,346,647 | 1.79  | 0        | 0        |
| RDN25 | 3170 | A | 1,335  | 1,496,002 | 612   | 1,530,045 | 749    | 1,370,868 | 287   | 1,346,647 | 2.34  | 0        | 0        |
| RDN25 | 3174 | A | 471    | 1,496,002 | 174   | 1,530,045 | 453    | 1,370,868 | 202   | 1,346,647 | 2.46  | 0        | 0        |
| RDN25 | 3180 | A | 116    | 1,496,002 | 65    | 1,530,045 | 139    | 1,370,868 | 96    | 1,346,647 | 1.58  | 5.19E-06 | 9.00E-06 |
| RDN25 | 3181 | C | 374    | 1,496,002 | 74    | 1,530,045 | 300    | 1,370,868 | 80    | 1,346,647 | 4.39  | 0        | 0        |
| RDN25 | 3183 | A | 2,767  | 1,496,002 | 888   | 1,530,045 | 1,668  | 1,370,868 | 622   | 1,346,647 | 2.96  | 0        | 0        |
| RDN25 | 3188 | G | 328    | 1,496,002 | 143   | 1,530,045 | 447    | 1,370,868 | 175   | 1,346,647 | 2.44  | 0        | 0        |
| RDN25 | 3199 | G | 244    | 1,496,002 | 141   | 1,530,045 | 317    | 1,370,868 | 151   | 1,346,647 | 1.92  | 0        | 0        |
| RDN25 | 3202 | G | 2,714  | 1,496,002 | 1,482 | 1,530,045 | 1,996  | 1,370,868 | 806   | 1,346,647 | 2.07  | 0        | 0        |
| RDN25 | 3205 | G | 295    | 1,496,002 | 128   | 1,530,045 | 311    | 1,370,868 | 162   | 1,346,647 | 2.09  | 0        | 0        |
| RDN25 | 3209 | A | 2,219  | 1,496,002 | 763   | 1,530,045 | 1,681  | 1,370,868 | 614   | 1,346,647 | 2.85  | 0        | 0        |
| RDN25 | 3218 | A | 138    | 1,496,002 | 70    | 1,530,045 | 201    | 1,370,868 | 69    | 1,346,647 | 2.44  | 0        | 0        |
| RDN25 | 3226 | A | 4,415  | 1,496,002 | 2,141 | 1,530,045 | 2,639  | 1,370,868 | 1,465 | 1,346,647 | 1.97  | 0        | 0        |
| RDN25 | 3228 | C | 133    | 1,496,002 | 72    | 1,530,045 | 125    | 1,370,868 | 75    | 1,346,647 | 1.76  | 3.97E-08 | 8.07E-08 |
| RDN25 | 3239 | G | 241    | 1,496,002 | 114   | 1,530,045 | 248    | 1,370,868 | 105   | 1,346,647 | 2.24  | 0        | 0        |
| RDN25 | 3244 | A | 503    | 1,496,002 | 354   | 1,530,045 | 676    | 1,370,868 | 330   | 1,346,647 | 1.73  | 0        | 0        |
| RDN25 | 3245 | A | 1,527  | 1,496,002 | 104   | 1,530,045 | 1,677  | 1,370,868 | 93    | 1,346,647 | 16.30 | 0        | 0        |
| RDN25 | 3254 | G | 932    | 1,496,002 | 415   | 1,530,045 | 846    | 1,370,868 | 296   | 1,346,647 | 2.51  | 0        | 0        |
| RDN25 | 3268 | A | 4,105  | 1,496,002 | 1,350 | 1,530,045 | 2,142  | 1,370,868 | 635   | 1,346,647 | 3.18  | 0        | 0        |
| RDN25 | 3305 | A | 994    | 1,496,002 | 428   | 1,530,045 | 817    | 1,370,868 | 384   | 1,346,647 | 2.24  | 0        | 0        |
| RDN25 | 3316 | A | 394    | 1,496,002 | 194   | 1,530,045 | 571    | 1,370,868 | 235   | 1,346,647 | 2.25  | 0        | 0        |
| RDN25 | 3318 | G | 398    | 1,496,002 | 222   | 1,530,045 | 593    | 1,370,868 | 297   | 1,346,647 | 1.91  | 0        | 0        |
| RDN25 | 3335 | A | 857    | 1,496,002 | 177   | 1,530,045 | 1,399  | 1,370,868 | 624   | 1,346,647 | 2.80  | 0        | 0        |
| RDN25 | 3336 | A | 4,536  | 1,496,002 | 296   | 1,        |        |           |       |           |       |          |          |

|           |     |   |       |        |     |        |       |        |     |        |       |           |           |
|-----------|-----|---|-------|--------|-----|--------|-------|--------|-----|--------|-------|-----------|-----------|
| SCR1      | 37  | G | 15    | 6,047  | 0   | 3,646  | 15    | 5,358  | 3   | 4,458  | 5.51  | 0.0007282 | 0.008639  |
| SCR1      | 59  | A | 66    | 6,047  | 23  | 3,646  | 96    | 5,358  | 34  | 4,458  | 2.08  | 1.78E-06  | 5.17E-05  |
| SCR1      | 101 | A | 89    | 6,047  | 1   | 3,646  | 121   | 5,358  | 17  | 4,458  | 8.94  | 0         | 0         |
| SCR1      | 112 | C | 131   | 6,047  | 17  | 3,646  | 116   | 5,358  | 40  | 4,458  | 3.14  | 1.22E-15  | 9.11E-14  |
| SCR1      | 145 | G | 21    | 6,047  | 4   | 3,646  | 30    | 5,358  | 9   | 4,458  | 2.91  | 0.0005631 | 0.00717   |
| SCR1      | 214 | G | 9     | 6,047  | 1   | 3,646  | 15    | 5,358  | 1   | 4,458  | 8.72  | 0.0006949 | 0.008435  |
| SCR1      | 225 | A | 71    | 6,047  | 20  | 3,646  | 66    | 5,358  | 19  | 4,458  | 2.48  | 3.45E-07  | 1.29E-05  |
| SCR1      | 227 | A | 74    | 6,047  | 25  | 3,646  | 69    | 5,358  | 20  | 4,458  | 2.23  | 1.96E-06  | 5.38E-05  |
| SCR1      | 236 | A | 62    | 6,047  | 12  | 3,646  | 44    | 5,358  | 8   | 4,458  | 3.65  | 2.00E-08  | 9.50E-07  |
| SCR1      | 273 | A | 212   | 6,047  | 13  | 3,646  | 220   | 5,358  | 24  | 4,458  | 8.47  | 0         | 0         |
| SCR1      | 310 | G | 28    | 6,047  | 6   | 3,646  | 20    | 5,358  | 8   | 4,458  | 2.42  | 0.004445  | 0.03413   |
| SCR1      | 364 | A | 361   | 6,047  | 23  | 3,646  | 214   | 5,358  | 8   | 4,458  | 12.49 | 0         | 0         |
| SCR1      | 400 | A | 100   | 6,047  | 7   | 3,646  | 49    | 5,358  | 6   | 4,458  | 7.83  | 1.11E-16  | 9.66E-15  |
| SCR1      | 402 | A | 725   | 6,047  | 43  | 3,646  | 209   | 5,358  | 28  | 4,458  | 8.68  | 0         | 0         |
| SCR1      | 405 | A | 16    | 6,047  | 0   | 3,646  | 6     | 5,358  | 0   | 4,458  | 7.47  | 0.003132  | 0.02555   |
| SCR1      | 406 | G | 53    | 6,047  | 18  | 3,646  | 34    | 5,358  | 13  | 4,458  | 1.93  | 0.001923  | 0.01761   |
| SCR1      | 413 | A | 212   | 6,047  | 23  | 3,646  | 80    | 5,358  | 9   | 4,458  | 6.03  | 0         | 0         |
| SCR1      | 417 | G | 37    | 6,047  | 12  | 3,646  | 16    | 5,358  | 4   | 4,458  | 2.19  | 0.006712  | 0.04734   |
| SCR1      | 421 | A | 21    | 6,047  | 0   | 3,646  | 4     | 5,358  | 1   | 4,458  | 8.30  | 0.001487  | 0.01465   |
| SCR1      | 448 | G | 17    | 6,047  | 0   | 3,646  | 23    | 5,358  | 3   | 4,458  | 7.45  | 1.67E-05  | 0.0003623 |
| SCR1      | 475 | A | 176   | 6,047  | 44  | 3,646  | 10    | 5,358  | 3   | 4,458  | 2.43  | 3.61E-08  | 1.45E-06  |
| snR10     | 13  | A | 14    | 396    | 0   | 285    | 23    | 367    | 1   | 288    | 13.96 | 4.90E-06  | 0.001199  |
| snR10     | 106 | A | 16    | 396    | 0   | 285    | 10    | 367    | 1   | 288    | 9.71  | 0.0003502 | 0.0429    |
| snR11     | 104 | A | 28    | 542    | 5   | 388    | 18    | 505    | 4   | 356    | 3.63  | 0.0003146 | 0.02706   |
| snR11     | 172 | A | 31    | 542    | 4   | 388    | 22    | 505    | 2   | 356    | 6.29  | 2.66E-06  | 0.0003436 |
| snR11     | 174 | A | 37    | 542    | 4   | 388    | 24    | 505    | 3   | 356    | 6.20  | 4.97E-07  | 0.0001283 |
| snR128    | 68  | A | 32    | 153    | 11  | 99     | 44    | 234    | 7   | 187    | 3.07  | 3.02E-05  | 0.003804  |
| snR17a    | 230 | A | 21    | 950    | 0   | 870    | 34    | 703    | 5   | 554    | 7.58  | 6.51E-08  | 3.19E-05  |
| snR17a    | 273 | A | 13    | 950    | 0   | 870    | 18    | 703    | 0   | 554    | 13.08 | 1.25E-05  | 0.001525  |
| snR17a    | 285 | A | 20    | 950    | 6   | 870    | 16    | 703    | 1   | 554    | 4.50  | 0.0001603 | 0.01309   |
| snR17a    | 286 | A | 25    | 950    | 3   | 870    | 14    | 703    | 0   | 554    | 8.53  | 2.51E-06  | 0.0006146 |
| snR17a    | 339 | A | 27    | 950    | 3   | 870    | 5     | 703    | 2   | 554    | 5.61  | 9.79E-05  | 0.009598  |
| snR17a    | 340 | A | 33    | 950    | 4   | 870    | 10    | 703    | 3   | 554    | 5.35  | 7.86E-06  | 0.001284  |
| snR17a    | 364 | A | 20    | 950    | 3   | 870    | 7     | 703    | 0   | 554    | 5.95  | 0.0003345 | 0.02049   |
| snR190    | 13  | A | 28    | 584    | 7   | 519    | 19    | 518    | 0   | 376    | 4.95  | 1.15E-05  | 0.0007308 |
| snR190    | 23  | C | 27    | 584    | 8   | 519    | 15    | 518    | 2   | 376    | 3.53  | 0.000306  | 0.01454   |
| snR190    | 31  | C | 45    | 584    | 8   | 519    | 13    | 518    | 5   | 376    | 3.72  | 9.47E-06  | 0.0008992 |
| snR190    | 44  | A | 40    | 584    | 1   | 519    | 19    | 518    | 0   | 376    | 24.10 | 1.64E-10  | 3.12E-08  |
| snR3      | 21  | A | 21    | 225    | 0   | 158    | 22    | 279    | 4   | 209    | 6.29  | 2.68E-05  | 0.005199  |
| snR3      | 126 | A | 9     | 225    | 1   | 158    | 17    | 279    | 1   | 209    | 9.47  | 0.0004385 | 0.04253   |
| snR30     | 98  | A | 37    | 1,637  | 2   | 1,141  | 18    | 1,437  | 4   | 1,207  | 6.97  | 4.64E-07  | 7.03E-05  |
| snR30     | 152 | A | 19    | 1,637  | 1   | 1,141  | 15    | 1,437  | 3   | 1,207  | 6.60  | 9.69E-05  | 0.007342  |
| snR30     | 196 | A | 33    | 1,637  | 7   | 1,141  | 23    | 1,437  | 3   | 1,207  | 4.18  | 1.05E-05  | 0.001267  |
| snR30     | 201 | A | 49    | 1,637  | 8   | 1,141  | 29    | 1,437  | 4   | 1,207  | 4.85  | 3.79E-08  | 1.15E-05  |
| snR30     | 254 | G | 31    | 1,637  | 3   | 1,141  | 19    | 1,437  | 1   | 1,207  | 9.27  | 3.44E-07  | 6.94E-05  |
| snR30     | 290 | A | 35    | 1,637  | 14  | 1,141  | 21    | 1,437  | 2   | 1,207  | 2.57  | 0.0007975 | 0.04393   |
| snR30     | 504 | G | 26    | 1,637  | 5   | 1,141  | 27    | 1,437  | 5   | 1,207  | 4.06  | 2.03E-05  | 0.002047  |
| snR30     | 546 | A | 18    | 1,637  | 0   | 1,141  | 17    | 1,437  | 2   | 1,207  | 9.04  | 2.25E-05  | 0.001946  |
| snR30     | 547 | A | 36    | 1,637  | 1   | 1,141  | 36    | 1,437  | 7   | 1,207  | 7.11  | 3.51E-09  | 2.13E-06  |
| snR37     | 332 | A | 29    | 379    | 4   | 445    | 34    | 487    | 8   | 466    | 5.45  | 4.92E-09  | 1.90E-06  |
| snR40     | 13  | A | 7     | 29     | 1   | 78     | 6     | 68     | 2   | 94     | 7.67  | 0.0004984 | 0.04835   |
| snR42     | 257 | A | 31    | 471    | 4   | 339    | 11    | 278    | 0   | 147    | 5.63  | 9.60E-05  | 0.03368   |
| snR52     | 26  | A | 36    | 261    | 13  | 260    | 25    | 162    | 3   | 132    | 3.57  | 7.48E-06  | 0.0006882 |
| snR73     | 33  | A | 29    | 69     | 0   | 66     | 17    | 41     | 0   | 27     | 18.93 | 2.64E-07  | 2.80E-05  |
| snR80     | 89  | A | 12    | 169    | 0   | 217    | 7     | 198    | 1   | 161    | 9.97  | 0.000299  | 0.02557   |
| td(GUC)G1 | 4   | G | 8     | 231    | 7   | 356    | 35    | 619    | 12  | 712    | 2.83  | 0.0002184 | 0.007862  |
| td(GUC)G1 | 20  | C | 15    | 231    | 9   | 356    | 111   | 619    | 36  | 712    | 3.37  | 3.59E-12  | 2.59E-10  |
| td(GUC)J1 | 17  | G | 11    | 256    | 3   | 398    | 27    | 661    | 12  | 734    | 3.05  | 0.0002226 | 0.005342  |
| tE(CUC)I  | 18  | G | 6     | 675    | 12  | 1,140  | 78    | 1,802  | 88  | 3,550  | 1.63  | 0.001426  | 0.02053   |
| tE(CUC)I  | 19  | C | 47    | 675    | 41  | 1,140  | 227   | 1,802  | 266 | 3,550  | 1.72  | 4.31E-10  | 3.10E-08  |
| tE(CUC)I  | 26  | A | 21    | 675    | 5   | 1,140  | 7     | 1,802  | 9   | 3,550  | 3.63  | 7.37E-05  | 0.001327  |
| tE(UUC)M  | 19  | C | 22    | 431    | 10  | 920    | 50    | 870    | 43  | 1,643  | 2.64  | 7.18E-08  | 5.17E-06  |
| tG(CCC)D  | 17  | G | 17    | 251    | 14  | 506    | 45    | 868    | 37  | 1,639  | 2.34  | 9.72E-06  | 0.0006995 |
| tG(UCC)G  | 17  | G | 9     | 426    | 25  | 754    | 111   | 2,203  | 119 | 4,846  | 1.78  | 4.79E-06  | 0.0003447 |
| tL(UAA)K  | 39  | A | 139   | 1,101  | 31  | 1,719  | 7     | 611    | 5   | 1,166  | 6.44  | 0         | 0         |
| tP(AGG)C  | 18  | G | 5     | 70     | 5   | 165    | 31    | 488    | 42  | 1,583  | 2.39  | 0.0001365 | 0.009831  |
| tS(AGA)D1 | 22  | A | 4     | 1,674  | 1   | 3,384  | 9     | 3,223  | 5   | 9,192  | 5.73  | 0.0002193 | 0.005994  |
| tS(AGA)D1 | 30  | G | 27    | 1,674  | 34  | 3,384  | 50    | 3,223  | 82  | 9,192  | 1.69  | 0.0004479 | 0.009183  |
| tS(AGA)D1 | 31  | A | 46    | 1,674  | 30  | 3,384  | 51    | 3,223  | 79  | 9,192  | 2.25  | 8.37E-09  | 6.87E-07  |
| tS(AGA)D2 | 17  | G | 5     | 492    | 7   | 1,004  | 26    | 1,024  | 19  | 2,899  | 3.11  | 1.33E-05  | 0.001087  |
| tW(CCA)K  | 40  | A | 12    | 126    | 5   | 139    | 13    | 190    | 2   | 231    | 4.12  | 0.0008621 | 0.04569   |
| YDR278C   | 59  | C | 12    | 631    | 8   | 1,367  | 81    | 2,080  | 83  | 3,973  | 1.98  | 4.76E-06  | 0.001514  |
| YDR278C   | 66  | A | 19    | 631    | 10  | 1,367  | 4     | 2,080  | 2   | 3,973  | 4.06  | 5.25E-05  | 0.008344  |
| YGL088W   | 163 | A | 14    | 429    | 0   | 422    | 23    | 413    | 1   | 376    | 17.40 | 2.21E-07  | 4.05E-05  |
| YGL088W   | 256 | A | 16    | 429    | 0   | 422    | 10    | 413    | 1   | 376    | 12.35 | 2.88E-05  | 0.00351   |
| YGR192C   | 487 | A | 10    | 900    | 2   | 1,086  | 11    | 1,530  | 1   | 2,027  | 8.79  | 4.94E-05  | 0.04938   |
| YLR110C   | 109 | A | 14    | 659    | 1   | 705    | 23    | 870    | 14  | 1,144  | 3.12  | 0.0002375 | 0.04774   |
| YLR110C   | 197 | C | 11    | 659    | 1   | 705    | 16    | 870    | 7   | 1,144  | 4.22  | 0.0002727 | 0.03654   |
| YLR110C   | 330 | C | 16    | 659    | 1   | 705    | 9     | 870    | 4   | 1,144  | 6.04  | 0.0001016 | 0.04084   |
| YLR154C-G | 9   | A | 425   | 11,939 | 41  | 10,732 | 638   | 17,049 | 57  | 17,173 | 10.43 | 0         | 0         |
| YLR154C-G | 11  | G | 680   | 11,939 | 397 | 10,732 | 828   | 17,049 | 549 | 17,173 | 1.53  | 0         | 0         |
| YLR154C-G | 36  | A | 738   | 11,939 | 382 | 10,732 | 897   | 17,049 | 439 | 17,173 | 1.91  | 0         | 0         |
| YLR154C-G | 57  | A | 1,633 | 11,939 | 422 | 10,732 | 1,652 | 17,049 | 572 | 17,173 | 3.16  | 0         | 0         |
| YLR154C-G | 84  | A | 494   | 11,939 | 124 | 10,732 | 477   | 17,049 | 239 | 17,173 | 2.56  | 0         | 0         |
| YLR154C-G | 94  | A | 576   | 11,939 | 103 | 10,732 | 1,046 | 17,049 | 308 | 17,173 | 3.84  | 0         | 0         |
