# Supplementary material
Source: HighWire-hosted journal article supplement (doi:10.1101/rna.042218.113)
Supplement: Mod-SEq_TableS3-REPLACEMENT.pdf [file Mod-SEq_TableS3-REPLACEMENT.pdf]

Table S3. Ribosomal RNA positions with increased DMS-dependent modification in the *rpl26Δ* strain. The number of sequence reads indicating modification at each site are shown (RT stops), as are the total number for the gene (Total RT stops). The enrichment ratio is the relative enrichment of RT stops at each position in RNA from DMS treated culture as compared to untreated culture. The results of statistical analysis are given, including both raw (CMH) and Benjamini-Hochberg corrected (B-H) p-values.

| Gene  | Position | 100 mM DMS <i>rpl26Δ</i> 1 |                | 100 mM DMS Wild-type 1 |                | 100 mM DMS <i>rpl26Δ</i> 2 |                | 100 mM DMS Wild-type 2 |                | Enrichment Ratio (DMS /) | CMH P-values | B-H adjusted P-values |
|-------|----------|----------------------------|----------------|------------------------|----------------|----------------------------|----------------|------------------------|----------------|--------------------------|--------------|-----------------------|
|       |          | RT stops                   | Total RT stops | RT stops               | Total RT stops | RT stops                   | Total RT stops | RT stops               | Total RT stops |                          |              |                       |
| RDN58 | 48       | 750                        | 92250          | 258                    | 60230          | 542                        | 119805         | 337                    | 103487         | 1.625                    | 0            | 0                     |
| RDN58 | 52       | 640                        | 92250          | 197                    | 60230          | 396                        | 119805         | 241                    | 103487         | 1.755                    | 0            | 0                     |
| RDN58 | 88       | 5261                       | 92250          | 601                    | 60230          | 6964                       | 119805         | 1646                   | 103487         | 4.256                    | 0            | 0                     |
| RDN58 | 89       | 8451                       | 92250          | 1510                   | 60230          | 9229                       | 119805         | 2827                   | 103487         | 3.131                    | 0            | 0                     |
| RDN18 | 152      | 43                         | 1001699        | 12                     | 769580         | 27                         | 771956         | 19                     | 672446         | 1.845                    | 0.0057       | 0.03664               |
| RDN18 | 337      | 73                         | 1001699        | 31                     | 769580         | 100                        | 771956         | 59                     | 672446         | 1.595                    | 0.0003743    | 0.004432              |
| RDN18 | 596      | 102                        | 1001699        | 36                     | 769580         | 63                         | 771956         | 45                     | 672446         | 1.658                    | 0.0002278    | 0.00306               |
| RDN18 | 753      | 231                        | 1001699        | 108                    | 769580         | 72                         | 771956         | 50                     | 672446         | 1.525                    | 1.91E-05     | 0.0003689             |
| RDN18 | 764      | 141                        | 1001699        | 51                     | 769580         | 57                         | 771956         | 54                     | 672446         | 1.522                    | 0.0006218    | 0.006432              |
| RDN18 | 770      | 202                        | 1001699        | 82                     | 769580         | 146                        | 771956         | 105                    | 672446         | 1.52                     | 4.51E-06     | 0.000104              |
| RDN18 | 777      | 181                        | 1001699        | 59                     | 769580         | 82                         | 771956         | 73                     | 672446         | 1.614                    | 8.65E-06     | 0.000177              |
| RDN18 | 1198     | 36                         | 1001699        | 14                     | 769580         | 37                         | 771956         | 15                     | 672446         | 2.063                    | 0.001068     | 0.009812              |
| RDN18 | 1228     | 87                         | 1001699        | 37                     | 769580         | 24                         | 771956         | 15                     | 672446         | 1.692                    | 0.002059     | 0.0167                |
| RDN18 | 1242     | 123                        | 1001699        | 42                     | 769580         | 65                         | 771956         | 41                     | 672446         | 1.833                    | 4.46E-06     | 0.0001043             |
| RDN18 | 1485     | 40                         | 1001699        | 15                     | 769580         | 54                         | 771956         | 33                     | 672446         | 1.628                    | 0.007334     | 0.04357               |
| RDN25 | 202      | 41                         | 1712976        | 17                     | 1496002        | 80                         | 1512478        | 45                     | 1370868        | 1.749                    | 0.0003864    | 0.002884              |
| RDN25 | 211      | 297                        | 1712976        | 140                    | 1496002        | 221                        | 1512478        | 160                    | 1370868        | 1.535                    | 3.42E-09     | 9.68E-08              |
| RDN25 | 221      | 2892                       | 1712976        | 395                    | 1496002        | 1615                       | 1512478        | 413                    | 1370868        | 4.95                     | 0            | 0                     |
| RDN25 | 319      | 166                        | 1712976        | 78                     | 1496002        | 60                         | 1512478        | 47                     | 1370868        | 1.598                    | 2.86E-05     | 0.0003161             |
| RDN25 | 336      | 141                        | 1712976        | 38                     | 1496002        | 72                         | 1512478        | 52                     | 1370868        | 2.102                    | 2.31E-09     | 6.82E-08              |
| RDN25 | 351      | 829                        | 1712976        | 176                    | 1496002        | 197                        | 1512478        | 106                    | 1370868        | 3.21                     | 0            | 0                     |
| RDN25 | 373      | 456                        | 1712976        | 223                    | 1496002        | 169                        | 1512478        | 115                    | 1370868        | 1.633                    | 2.86E-13     | 1.47E-11              |
| RDN25 | 375      | 84                         | 1712976        | 40                     | 1496002        | 57                         | 1512478        | 38                     | 1370868        | 1.605                    | 0.0009207    | 0.00599               |
| RDN25 | 376      | 587                        | 1712976        | 289                    | 1496002        | 228                        | 1512478        | 161                    | 1370868        | 1.6                      | 8.88E-16     | 6.03E-14              |
| RDN25 | 394      | 1587                       | 1712976        | 723                    | 1496002        | 613                        | 1512478        | 405                    | 1370868        | 1.723                    | 0            | 0                     |
| RDN25 | 684      | 21                         | 1712976        | 9                      | 1496002        | 15                         | 1512478        | 5                      | 1370868        | 2.278                    | 0.01081      | 0.04543               |
| RDN25 | 1228     | 35                         | 1712976        | 21                     | 1496002        | 52                         | 1512478        | 25                     | 1370868        | 1.687                    | 0.00485      | 0.02418               |
| RDN25 | 1335     | 85                         | 1712976        | 33                     | 1496002        | 238                        | 1512478        | 153                    | 1370868        | 1.561                    | 1.36E-06     | 2.22E-05              |
| RDN25 | 1336     | 135                        | 1712976        | 85                     | 1496002        | 296                        | 1512478        | 165                    | 1370868        | 1.544                    | 4.55E-08     | 1.04E-06              |
| RDN25 | 1343     | 49                         | 1712976        | 17                     | 1496002        | 42                         | 1512478        | 32                     | 1370868        | 1.655                    | 0.005343     | 0.026                 |
| RDN25 | 1345     | 128                        | 1712976        | 63                     | 1496002        | 120                        | 1512478        | 81                     | 1370868        | 1.533                    | 4.94E-05     | 0.0005117             |
| RDN25 | 1390     | 128                        | 1712976        | 59                     | 1496002        | 119                        | 1512478        | 65                     | 1370868        | 1.772                    | 1.82E-07     | 3.74E-06              |
| RDN25 | 1413     | 109                        | 1712976        | 46                     | 1496002        | 85                         | 1512478        | 69                     | 1370868        | 1.502                    | 0.0006339    | 0.004402              |
| RDN25 | 1895     | 348                        | 1712976        | 172                    | 1496002        | 194                        | 1512478        | 145                    | 1370868        | 1.516                    | 3.97E-09     | 1.11E-07              |
| RDN25 | 1897     | 43                         | 1712976        | 19                     | 1496002        | 26                         | 1512478        | 13                     | 1370868        | 1.911                    | 0.002883     | 0.01582               |
| RDN25 | 1901     | 103                        | 1712976        | 41                     | 1496002        | 59                         | 1512478        | 49                     | 1370868        | 1.598                    | 0.0004133    | 0.003071              |
| RDN25 | 1904     | 39                         | 1712976        | 17                     | 1496002        | 18                         | 1512478        | 10                     | 1370868        | 1.867                    | 0.009161     | 0.03963               |
| RDN25 | 1938     | 36                         | 1712976        | 10                     | 1496002        | 35                         | 1512478        | 26                     | 1370868        | 1.761                    | 0.006911     | 0.03155               |
| RDN25 | 2924     | 18                         | 1712976        | 3                      | 1496002        | 51                         | 1512478        | 32                     | 1370868        | 1.775                    | 0.006917     | 0.03153               |
| RDN25 | 3161     | 49                         | 1712976        | 24                     | 1496002        | 107                        | 1512478        | 65                     | 1370868        | 1.572                    | 0.0007609    | 0.005087              |
| RDN25 | 3265     | 88                         | 1712976        | 45                     | 1496002        | 52                         | 1512478        | 33                     | 1370868        | 1.591                    | 0.001172     | 0.007425              |
| RDN25 | 3302     | 106                        | 1712976        | 38                     | 1496002        | 63                         | 1512478        | 51                     | 1370868        | 1.687                    | 7.17E-05     | 0.0006934             |
