# Supplementary material
Source: HighWire-hosted journal article supplement (doi:10.1101/rna.042218.113)
Supplement: SuppFigLegends.docx [file SuppFigLegends.docx]

**Figure S1**. Mod-seq results at different concentrations of *in vivo* DMS treatment. Log-phase yeast were treated with differing amounts of DMS for 2 minutes, RNA was prepared, and Mod-seq was performed. Mod-seq results are shown in genome browser views depicting normalized read-hits corresponding to modification at each nucleotide. The enlarged regions (lower) show RT stops at endogenously modified bases (black, left), as well as DMS-dependent RT stops ~ 40 nt downstream. At 200 to 400 mM DMS, detection of endogenous modifications begins to be masked by saturation of downstream DMS modifications.

**Figure S2.** Circularization reactions are highly efficient. cDNAs were split into equal fractions. One fraction was treated with circligase, precipitated and resuspended. Circligase treated and untreated control samples were analyzed using an Agilent Tapestation with RNA tapes (denaturing), and the resulting images are shown above. cDNAs treated with circligase were circularized essentially to completion, as linear cDNAs were no longer present in circligase treated samples.

**Figure S3**. Secondary structure model of 25S, 18S, and 5.8S with significantly modified residues identified by Mod-seq. Fold-enrichment values of significantly modified nucleotides are shown using color coding for (A) 5.8S and the 5’ end of 25S rRNAs, (B) the 3’ end of 25S rRNA, and (C) 18S rRNA.

**Figure S4**. Comparing Mod-seq significant sites of *in vivo* DMS modification with traditional analyses by primer extension and PAGE. Cells were treated with a range of DMS concentrations. The asterisk indicates the concentration of DMS utilized in Mod-seq experiments. Results from primer extension gels from the 158 nt long 5.8S rRNA (A) and 5’ region of the 3,396 nt long 25S rRNA (B) are shown. For comparison, fold-enrichment values of modified A and C nucleotides identified by Mod-seq are indicated. A full listing of modified nucleotides is given in Table S2.

**Figure S5**. Secondary structure model of 25S, 18S, and 5.8S showing nucleotides with significantly more modification in the *rpl26∆* strain, compared to wildtype (BY4741). Fold-enrichment values of significantly modified nucleotides are shown using color coding for (A) 5.8S and the 5’ end of 25S rRNAs, (B) the 3’ end of 25S rRNA, and (C) 18S rRNA. The most prominent differences are indicated with arrows, and cluster around the protein binding site in the 5.8S and 25S rRNAs (A).
